# Supplementary material for: Comparative Transcriptome Analysis Reveals Molecular Mechanism and Regulatory Network of Rosa Chinensis ‘Old Blush’ Leaves in Response to Drought Stress
Source: Research Square preprint supplement (doi:10.21203/rs.3.rs-112819/v1), 2020-11-24
Supplement: Supplementary file 1 [file 5b12b8eb88a634744b7ae9dd.xlsx]

## Sheet: Sheet1
Table S1 The top 20 enriched GO terms of up-regulated DEGs
	GO ID	GO Term	GO Class	Pvalue	Number of all genes with GO Annotation	Number of DEGs with GO Annotation
CK vs DT1	GO:0003824	catalytic activity	Molecular Function	0.00399368	7778	1138
	GO:0016740	transferase activity	Molecular Function	0.0220506	2828	432
	GO:0016787	hydrolase activity	Molecular Function	0.0210122	2104	327
	GO:0016020	membrane	Cellular Component	0.00209605	2397	350
	GO:0044425	membrane part	Cellular Component	2.20713e-07	1782	294
	GO:0031224	intrinsic component of membrane	Cellular Component	1.88622e-10	1628	287
	GO:0005975	carbohydrate metabolic process	Biological Process	0.000723234	593	110
	GO:0005976	polysaccharide metabolic process	Biological Process	3.15754e-08	337	84
	GO:0071944	cell periphery	Cellular Component	1.93711e-14	208	69
	GO:0030312	external encapsulating structure	Cellular Component	6.85505e-14	194	65
	GO:0071554	cell wall organization or biogenesis	Biological Process	3.54051e-09	183	56
	GO:0016757	transferase activity, transferring glycosyl groups	Molecular Function	3.79179e-08	392	95
	GO:0045229	external encapsulating structure organization	Biological Process	6.06034e-07	225	59
	GO:0005576	extracellular region	Cellular Component	1.14063e-11	157	53
	GO:0016798	hydrolase activity, acting on glycosyl bonds	Molecular Function	0.000428774	233	52
	GO:0016758	transferase activity, transferring hexosyl groups	Molecular Function	3.35395e-08	191	56
	GO:0004553	hydrolase activity, hydrolyzing O-glycosyl compounds	Molecular Function	0.000917962	184	42
	GO:0009719	response to endogenous stimulus	Biological Process	0.00111968	293	60
	GO:0005856	cytoskeleton	Cellular Component	0.00505211	161	33
	GO:0071310	cellular response to organic substance	Biological Process	0.00141707	272	56
CK vs DT2	GO:0044699	single-organism process	Biological Process	1	1030	501
	GO:0044710	single-organism metabolic process	Biological Process	0.0054567	654	316
	GO:0016020	membrane	Cellular Component	0.000205081	485	237
	GO:0043167	ion binding	Molecular Function	0.0281838	414	231
	GO:0043169	cation binding	Molecular Function	0.0144081	382	215
	GO:0044425	membrane part	Cellular Component	2.94002e-07	391	189
	GO:0031224	intrinsic component of membrane	Cellular Component	5.33761e-07	360	184
	GO:0016491	oxidoreductase activity	Molecular Function	0.000943926	271	142
	GO:0005975	carbohydrate metabolic process	Biological Process	0.00225644	137	81
	GO:0005215	transporter activity	Molecular Function	0.0285958	145	64
	GO:0016757	transferase activity, transferring glycosyl groups	Molecular Function	0.00104202	98	61
	GO:0022857	transmembrane transporter activity	Molecular Function	0.0357105	126	58
	GO:0044711	single-organism biosynthetic process	Biological Process	0.0483389	145	52
	GO:0005976	polysaccharide metabolic process	Biological Process	6.32481e-05	91	51
	GO:0071944	cell periphery	Cellular Component	7.37954e-05	60	46
	GO:0030312	external encapsulating structure	Cellular Component	1.52898e-05	59	45
	GO:0016758	transferase activity, transferring hexosyl groups	Molecular Function	1.50386e-05	60	43
	GO:0005576	extracellular region	Cellular Component	1.13264e-08	58	40
	GO:0016798	hydrolase activity, acting on glycosyl bonds	Molecular Function	0.0498429	54	40
	GO:0009719	response to endogenous stimulus	Biological Process	0.00796627	71	39
CK vs DT3	GO:0008152	metabolic process	Biological Process	0.0060465	2663	839
	GO:0009987	cellular process	Biological Process	0.000206329	2369	736
	GO:0044699	single-organism process	Biological Process	1.92069e-05	1882	661
	GO:0044237	cellular metabolic process	Biological Process	0.000127624	1864	540
	GO:0044763	single-organism cellular process	Biological Process	4.26415e-07	1293	425
	GO:0044710	single-organism metabolic process	Biological Process	0.000119434	1168	408
	GO:0016740	transferase activity	Molecular Function	0.00164357	991	312
	GO:0016020	membrane	Cellular Component	0.0126993	818	291
	GO:0043226	organelle	Cellular Component	0.0429891	973	237
	GO:0043229	intracellular organelle	Cellular Component	0.0267673	955	229
	GO:0044425	membrane part	Cellular Component	2.45445e-05	646	226
	GO:0043227	membrane-bounded organelle	Cellular Component	0.00363693	911	224
	GO:0031224	intrinsic component of membrane	Cellular Component	4.61851e-07	608	219
	GO:0043231	intracellular membrane-bounded organelle	Cellular Component	0.00148946	887	212
	GO:0006793	phosphorus metabolic process	Biological Process	1.88428e-05	685	198
	GO:0006796	phosphate-containing compound metabolic process	Biological Process	1.60356e-05	677	197
	GO:0065007	biological regulation	Biological Process	0.00158897	686	193
	GO:0050896	response to stimulus	Biological Process	0.039208	565	187
	GO:0050789	regulation of biological process	Biological Process	0.00674213	615	174
	GO:0016772	transferase activity, transferring phosphorus-containing groups	Molecular Function	0.00560491	561	168
CK vs RW	GO:0003824	catalytic activity	Molecular Function	0.00109304	1226	723
	GO:0016740	transferase activity	Molecular Function	0.020014	463	270
	GO:0016020	membrane	Cellular Component	8.41621e-08	409	238
	GO:0044425	membrane part	Cellular Component	1.01687e-12	341	198
	GO:0031224	intrinsic component of membrane	Cellular Component	3.36904e-14	323	193
	GO:0016491	oxidoreductase activity	Molecular Function	0.00919764	215	127
	GO:0005975	carbohydrate metabolic process	Biological Process	0.00143454	114	91
	GO:0044765	single-organism transport	Biological Process	0.0476342	167	82
	GO:0005976	polysaccharide metabolic process	Biological Process	1.14832e-07	86	72
	GO:0071944	cell periphery	Cellular Component	2.56555e-09	62	57
	GO:0016757	transferase activity, transferring glycosyl groups	Molecular Function	1.57521e-07	98	57
	GO:0045229	external encapsulating structure organization	Biological Process	2.09599e-06	60	55
	GO:0030312	external encapsulating structure	Cellular Component	2.0646e-08	57	53
	GO:0071554	cell wall organization or biogenesis	Biological Process	4.36662e-09	58	51
	GO:0005576	extracellular region	Cellular Component	8.31485e-11	54	47
	GO:0006811	ion transport	Biological Process	0.00522282	99	43
	GO:0016798	hydrolase activity, acting on glycosyl bonds	Molecular Function	0.0488722	45	42
	GO:0016758	transferase activity, transferring hexosyl groups	Molecular Function	1.08962e-05	52	39
	GO:0009888	tissue development	Biological Process	0.00790382	44	37
	GO:0044262	cellular carbohydrate metabolic process	Biological Process	0.0178098	50	37
