# Supplementary material for: Comparative Transcriptome Analysis Reveals Molecular Mechanism and Regulatory Network of Rosa Chinensis ‘Old Blush’ Leaves in Response to Drought Stress
Source: Research Square preprint supplement (doi:10.21203/rs.3.rs-112819/v1), 2020-11-24
Supplement: Supplementary file 2 [file 743ef09f394736eeebe09742.xlsx]

## Sheet: Sheet1
Table S2 The top 20 enriched GO terms of down-regulated DEGs
	GO ID	GO Term	GO Class	Pvalue	Number of all genes with GO Annotation	Number of DEGs with GO Annotation
CK vs DT1	GO:0003824	catalytic activity	Molecular Function	0.00399368	7778	444
	GO:0016740	transferase activity	Molecular Function	0.0220506	2828	172
	GO:0016020	membrane	Cellular Component	0.00209605	2397	134
	GO:0044425	membrane part	Cellular Component	2.20713e-07	1782	111
	GO:0031224	intrinsic component of membrane	Cellular Component	1.88622e-10	1628	106
	GO:0016787	hydrolase activity	Molecular Function	0.0210122	2104	96
	GO:0016757	transferase activity, transferring glycosyl groups	Molecular Function	3.79179e-08	392	43
	GO:0005975	carbohydrate metabolic process	Biological Process	0.000723234	593	32
	GO:0009719	response to endogenous stimulus	Biological Process	0.00111968	293	27
	GO:0071310	cellular response to organic substance	Biological Process	0.00141707	272	25
	GO:0070887	cellular response to chemical stimulus	Biological Process	0.00154774	273	25
	GO:0005976	polysaccharide metabolic process	Biological Process	3.15754e-08	337	22
	GO:0044042	glucan metabolic process	Biological Process	0.000253188	226	21
	GO:0009725	response to hormone	Biological Process	0.00626713	260	21
	GO:0043207	response to external biotic stimulus	Biological Process	0.0400857	206	21
	GO:0051707	response to other organism	Biological Process	0.0400857	206	21
	GO:0009607	response to biotic stimulus	Biological Process	0.0455558	208	21
	GO:0009755	hormone-mediated signaling pathway	Biological Process	0.000610062	200	19
	GO:0032870	cellular response to hormone stimulus	Biological Process	0.000610062	200	19
	GO:0071495	cellular response to endogenous stimulus	Biological Process	0.000610062	200	19
CK vs DT2	GO:0044699	single-organism process	Biological Process	0.0490589	5386	529
	GO:0044710	single-organism metabolic process	Biological Process	0.0054567	3277	338
	GO:0016020	membrane	Cellular Component	0.000205081	2397	248
	GO:0044425	membrane part	Cellular Component	2.94002e-07	1782	202
	GO:0009536	plastid	Cellular Component	4.0114e-06	960	187
	GO:0043167	ion binding	Molecular Function	0.0281838	2046	183
	GO:0031224	intrinsic component of membrane	Cellular Component	5.33761e-07	1628	176
	GO:0043169	cation binding	Molecular Function	0.0144081	1858	167
	GO:0016491	oxidoreductase activity	Molecular Function	0.000943926	1228	129
	GO:0044435	plastid part	Cellular Component	7.70949e-06	505	114
	GO:0044711	single-organism biosynthetic process	Biological Process	0.0483389	691	93
	GO:0005215	transporter activity	Molecular Function	0.0285958	671	81
	GO:0022857	transmembrane transporter activity	Molecular Function	0.0357105	581	68
	GO:0009507	chloroplast	Cellular Component	0.000125243	194	56
	GO:0005975	carbohydrate metabolic process	Biological Process	0.00225644	593	56
	GO:0009579	thylakoid	Cellular Component	1.00872e-07	150	54
	GO:0044434	chloroplast part	Cellular Component	0.000811408	176	49
	GO:0051186	cofactor metabolic process	Biological Process	0.00607593	257	47
	GO:0009532	plastid stroma	Cellular Component	0.0020274	229	46
	GO:0009526	plastid envelope	Cellular Component	0.0165826	198	45
CK vs DT3	GO:0008152	metabolic process	Biological Process	0.0060465	7889	1824
	GO:0009987	cellular process	Biological Process	0.000206329	6916	1633
	GO:0044237	cellular metabolic process	Biological Process	0.000127624	5364	1324
	GO:0044699	single-organism process	Biological Process	1.92069e-05	5386	1221
	GO:0044763	single-organism cellular process	Biological Process	4.26415e-07	3564	868
	GO:0044710	single-organism metabolic process	Biological Process	0.000119434	3277	760
	GO:0043226	organelle	Cellular Component	0.0429891	2901	736
	GO:0043229	intracellular organelle	Cellular Component	0.0267673	2834	726
	GO:0043227	membrane-bounded organelle	Cellular Component	0.00363693	2658	687
	GO:0016740	transferase activity	Molecular Function	0.00164357	2828	679
	GO:0043231	intracellular membrane-bounded organelle	Cellular Component	0.00148946	2569	675
	GO:0016020	membrane	Cellular Component	0.0126993	2397	527
	GO:0009058	biosynthetic process	Biological Process	0.00488429	1838	496
	GO:0065007	biological regulation	Biological Process	0.00158897	1903	493
	GO:0006793	phosphorus metabolic process	Biological Process	1.88428e-05	1837	487
	GO:0006796	phosphate-containing compound metabolic process	Biological Process	1.60356e-05	1812	480
	GO:1901576	organic substance biosynthetic process	Biological Process	0.002232	1719	476
	GO:0005737	cytoplasm	Cellular Component	0.0071829	1696	461
	GO:0044444	cytoplasmic part	Cellular Component	0.0042558	1675	460
	GO:0044249	cellular biosynthetic process	Biological Process	0.0210905	1700	452
CK vs RW	GO:0003824	catalytic activity	Molecular Function	0.00109304	7778	503
	GO:0016740	transferase activity	Molecular Function	0.020014	2828	193
	GO:0016020	membrane	Cellular Component	8.41621e-08	2397	171
	GO:0044425	membrane part	Cellular Component	1.01687e-12	1782	143
	GO:0031224	intrinsic component of membrane	Cellular Component	3.36904e-14	1628	130
	GO:0016491	oxidoreductase activity	Molecular Function	0.00919764	1228	88
	GO:0044765	single-organism transport	Biological Process	0.0476342	1004	85
	GO:0006811	ion transport	Biological Process	0.00522282	525	56
	GO:0016757	transferase activity, transferring glycosyl groups	Molecular Function	1.57521e-07	392	41
	GO:0022804	active transmembrane transporter activity	Molecular Function	0.00364961	255	36
	GO:0046906	tetrapyrrole binding	Molecular Function	0.00212446	282	31
	GO:0065008	regulation of biological quality	Biological Process	0.00476066	299	26
	GO:0009719	response to endogenous stimulus	Biological Process	0.0479819	293	25
	GO:0015291	secondary active transmembrane transporter activity	Molecular Function	6.49852e-06	109	24
	GO:0051704	multi-organism process	Biological Process	0.0463533	232	24
	GO:0005975	carbohydrate metabolic process	Biological Process	0.00143454	593	23
	GO:0043207	response to external biotic stimulus	Biological Process	0.017247	206	23
	GO:0051707	response to other organism	Biological Process	0.017247	206	23
	GO:0009607	response to biotic stimulus	Biological Process	0.0201232	208	23
	GO:0016705	oxidoreductase activity, acting on paired donors, with incorporation or reduction of molecular oxygen	Molecular Function	0.0207795	209	21
