# Supplementary material for: Comparative Transcriptome Analysis Reveals Molecular Mechanism and Regulatory Network of Rosa Chinensis ‘Old Blush’ Leaves in Response to Drought Stress
Source: Research Square preprint supplement (doi:10.21203/rs.3.rs-112819/v1), 2020-11-24
Supplement: Supplementary file 3 [file 94887f951638b603180984a3.xlsx]

## Sheet: Sheet1
Table S11 Transcription factor families
Gene id	Gene name	Description	TF family	Log2 fold change(DT1/CK)	Log2 fold change(DT2/CK)	Log2 fold change(DT3/CK)	Log2 fold change(RW/CK)
RchiOBHm_Chr3g0485711	WRKY42	PREDICTED: probable WRKY transcription factor 47 isoform X2 [Fragaria vesca subsp. vesca] [Fragaria vesca]	WRKY	-1.69118	-2.40546	/	-4.13841
RchiOBHm_Chr3g0450591	WRKY74	PREDICTED: probable WRKY transcription factor 74 [Fragaria vesca subsp. vesca] [Fragaria vesca]	WRKY	-1.59397	/	/	/
RchiOBHm_Chr5g0011581	WRKY65	PREDICTED: probable WRKY transcription factor 65 isoform X1 [Fragaria vesca subsp. vesca] [Fragaria vesca]	WRKY	/	/	1.14609	/
RchiOBHm_Chr5g0018041	WRKY14	PREDICTED: probable WRKY transcription factor 14 [Fragaria vesca subsp. vesca] [Fragaria vesca]	WRKY	/	/	1.73151	/
RchiOBHm_Chr5g0040801	WRKY6	PREDICTED: probable WRKY transcription factor 31 [Fragaria vesca subsp. vesca] [Fragaria vesca]	WRKY	/	1.60742	3.82423	/
RchiOBHm_Chr4g0429851	WRKY75	PREDICTED: probable WRKY transcription factor 75 [Fragaria vesca subsp. vesca] [Fragaria vesca]	WRKY	-1.73825	/	3.65125	-2.04931
RchiOBHm_Chr4g0440391	WRKY72	PREDICTED: probable WRKY transcription factor 72 [Fragaria vesca subsp. vesca] [Fragaria vesca]	WRKY	/	/	/	/
RchiOBHm_Chr4g0439041	WRKY3	PREDICTED: probable WRKY transcription factor 3 [Fragaria vesca subsp. vesca] [Fragaria vesca]	WRKY	/	/	2.21822	/
RchiOBHm_Chr2g0175911	WRKY75	PREDICTED: probable WRKY transcription factor 75 [Fragaria vesca subsp. vesca] [Fragaria vesca]	WRKY	/	/	5.64386	/
RchiOBHm_Chr5g0013131	WRKY71	PREDICTED: probable WRKY transcription factor 71 [Fragaria vesca subsp. vesca] [Fragaria vesca]	WRKY	/	1.27772	5.39436	-1.42011
RchiOBHm_Chr1g0378621	WRKY27	PREDICTED: probable WRKY transcription factor 27 [Fragaria vesca subsp. vesca] [Fragaria vesca]	WRKY	/	/	2.84626	/
RchiOBHm_Chr2g0166991	WRKY4	PREDICTED: probable WRKY transcription factor 3 [Fragaria vesca subsp. vesca] [Fragaria vesca]	WRKY	/	/	1.92406	/
RchiOBHm_Chr2g0151681	WRKY28	PREDICTED: probable WRKY transcription factor 71 [Fragaria vesca subsp. vesca] [Fragaria vesca]	WRKY	/	/	2.43296	-2.974
RchiOBHm_Chr3g0485691	WRKY42	PREDICTED: probable WRKY transcription factor 47 isoform X2 [Fragaria vesca subsp. vesca] [Fragaria vesca]	WRKY	/	/	1.9445	/
RchiOBHm_Chr6g0299481	WRKY40	PREDICTED: probable WRKY transcription factor 40 isoform X2 [Fragaria vesca subsp. vesca] [Fragaria vesca]	WRKY	/	1.92089	/	/
RchiOBHm_Chr2g0106361	WRKY7	PREDICTED: probable WRKY transcription factor 7 [Prunus mume]	WRKY	/	1.11392	/	/
RchiOBHm_Chr4g0425801	WRKY48	PREDICTED: probable WRKY transcription factor 48 [Fragaria vesca subsp. vesca] [Fragaria vesca]	WRKY	/	1.26768	/	-1.15032
RchiOBHm_Chr6g0305101	WRKY17	PREDICTED: probable WRKY transcription factor 17 [Fragaria vesca subsp. vesca] [Fragaria vesca]	WRKY	-1.63541	/	/	/
RchiOBHm_Chr1g0380121	WRKY53	PREDICTED: probable WRKY transcription factor 41 [Fragaria vesca subsp. vesca] [Fragaria vesca]	WRKY	-3.70761	1.55965	-2.43101	/
RchiOBHm_Chr6g0299501	WRKY40	PREDICTED: probable WRKY transcription factor 40 isoform X2 [Fragaria vesca subsp. vesca] [Fragaria vesca]	WRKY	-2.11812	1.61024	-1.42773	/
RchiOBHm_Chr3g0461481	WRKY24	WRKY transcription factor 42 [Fragaria vesca]	WRKY	-3.86334	/	-1.85363	/
RchiOBHm_Chr2g0133001	WRKY40	PREDICTED: probable WRKY transcription factor 40 [Fragaria vesca subsp. vesca] [Fragaria vesca]	WRKY	-2.41066	/	-2.65705	/
RchiOBHm_Chr7g0195191	WRKY53	PREDICTED: probable WRKY transcription factor 53 [Fragaria vesca subsp. vesca] [Fragaria vesca]	WRKY	-3.50118	/	-3.60558	/
RchiOBHm_Chr5g0042581	WRKY20	SUSI1 [Rosa hybrid cultivar]	WRKY	/	/	/	/
RchiOBHm_Chr2g0156771	WRKY1	PREDICTED: WRKY transcription factor 1 isoform X3 [Fragaria vesca subsp. vesca] [Fragaria vesca]	WRKY	/	/	/	/
RchiOBHm_Chr5g0002561	WRKY6	PREDICTED: probable WRKY transcription factor 31 [Fragaria vesca subsp. vesca] [Fragaria vesca]	WRKY	-2.48282	1.19822	/	-1.11987
RchiOBHm_Chr5g0071811	WRKY24	PREDICTED: probable WRKY transcription factor 25 [Fragaria vesca subsp. vesca] [Fragaria vesca]	WRKY	-2.15601	/	/	/
RchiOBHm_Chr1g0372441	WRKY70	PREDICTED: probable WRKY transcription factor 70 [Fragaria vesca subsp. vesca] [Fragaria vesca]	WRKY	-1.66815	/	-3.53843	1.39576
RchiOBHm_Chr1g0359091	WRKY46	WRKY transcription factor 51 [Fragaria vesca]	WRKY	-2.12262	/	-4.35631	/
RchiOBHm_Chr7g0186621	WRKY50	PREDICTED: probable disease resistance protein At5g66900 isoform X1 [Fragaria vesca subsp. vesca] [Fragaria vesca]	WRKY	/	/	/	/
RchiOBHm_Chr3g0460361	WRKY70	PREDICTED: probable WRKY transcription factor 70 [Fragaria vesca subsp. vesca] [Fragaria vesca]	WRKY	/	/	-2.76746	1.14426
RchiOBHm_Chr1g0372431	WRKY55	PREDICTED: WRKY transcription factor 55 [Fragaria vesca subsp. vesca] [Fragaria vesca]	WRKY	/	1.83806	-2.37295	1.95617
RchiOBHm_Chr6g0311421	WRKY50	PREDICTED: probable WRKY transcription factor 50 [Fragaria vesca subsp. vesca] [Fragaria vesca]	WRKY	/	1.64724	-4.91066	1.98748
RchiOBHm_Chr5g0083891	WRKY57	PREDICTED: probable WRKY transcription factor 58 [Fragaria vesca subsp. vesca] [Fragaria vesca]	WRKY	/	/	7.92679	9.66178
RchiOBHm_Chr5g0046581	WRKY41	PREDICTED: probable WRKY transcription factor 41 [Fragaria vesca subsp. vesca] [Fragaria vesca]	WRKY	/	-1.1867	-2.63589	/
RchiOBHm_Chr2g0117781	WRKY13	PREDICTED: probable WRKY transcription factor 13 [Fragaria vesca subsp. vesca] [Fragaria vesca]	WRKY	/	/	/	/
RchiOBHm_Chr1g0348121	WRKY12	PREDICTED: probable WRKY transcription factor 12 [Fragaria vesca subsp. vesca] [Fragaria vesca]	WRKY	/	/	/	/
RchiOBHm_Chr2g0117181	WRKY51	PREDICTED: probable WRKY transcription factor 51 [Fragaria vesca subsp. vesca] [Fragaria vesca]	WRKY	/	-1.4335	-5.22712	/
RchiOBHm_Chr2g0158801	WRKY6	PREDICTED: probable WRKY transcription factor 31 [Fragaria vesca subsp. vesca] [Fragaria vesca]	WRKY	/	/	-1.96669	/
RchiOBHm_Chr3g0460351	WRKY70	PREDICTED: probable WRKY transcription factor 70 [Fragaria vesca subsp. vesca] [Fragaria vesca]	WRKY	/	/	/	/
RchiOBHm_Chr5g0074411	WRKY2	PREDICTED: probable WRKY transcription factor 2 [Fragaria vesca subsp. vesca] [Fragaria vesca]	WRKY	/	/	/	/
RchiOBHm_Chr7g0241021	WRKY35	PREDICTED: probable WRKY transcription factor 65 [Fragaria vesca subsp. vesca] [Fragaria vesca]	WRKY	/	/	/	/
RchiOBHm_Chr1g0357751	WRKY43	PREDICTED: probable WRKY transcription factor 24 [Fragaria vesca subsp. vesca] [Fragaria vesca]	WRKY	/	/	/	/
RchiOBHm_Chr6g0308491	WRKY7	PREDICTED: probable WRKY transcription factor 7 [Fragaria vesca subsp. vesca] [Fragaria vesca]	WRKY	/	-1.59742	/	/
RchiOBHm_Chr3g0447881	WRKY46	PREDICTED: probable WRKY transcription factor 2 isoform X2 [Fragaria vesca subsp. vesca] [Fragaria vesca]	WRKY	-1.25037	-1.72076	/	-1.88264
RchiOBHm_Chr7g0180741	WRKY61	PREDICTED: probable WRKY transcription factor 61 [Fragaria vesca subsp. vesca] [Fragaria vesca]	WRKY	-2.05671	-2.4096	/	-3.4154
RchiOBHm_Chr3g0468221	WRKY44	PREDICTED: WRKY transcription factor 44 [Fragaria vesca subsp. vesca] [Fragaria vesca]	WRKY	/	/	/	/
RchiOBHm_Chr2g0169011	WRKY72	PREDICTED: probable WRKY transcription factor 72 [Fragaria vesca subsp. vesca] [Fragaria vesca]	WRKY	-2.60907	-2.81802	/	-3.76288
RchiOBHm_Chr2g0130891	WRKY69	PREDICTED: probable WRKY transcription factor 65 [Fragaria vesca subsp. vesca] [Fragaria vesca]	WRKY	/	-3.63941	/	/
RchiOBHm_Chr7g0202671	WRKY21	PREDICTED: probable WRKY transcription factor 15 [Prunus mume]	WRKY	/	/	-3.41504	/
RchiOBHm_Chr2g0085691	WRKY32	PREDICTED: probable WRKY transcription factor 32 [Fragaria vesca subsp. vesca] [Fragaria vesca]	WRKY	/	/		/
RchiOBHm_Chr7g0196571	WRKY22	PREDICTED: probable WRKY transcription factor 29 isoform X1 [Fragaria vesca subsp. vesca] [Fragaria vesca]	WRKY	-1.7867	/	-2.20401	-1.60693
RchiOBHm_Chr1g0357671	WRKY22	PREDICTED: WRKY transcription factor 22 [Fragaria vesca subsp. vesca] [Fragaria vesca]	WRKY	-1.65592	/	-2.1715	-1.9558
RchiOBHm_Chr4g0398741	WRKY11	PREDICTED: probable WRKY transcription factor 11 [Fragaria vesca subsp. vesca] [Fragaria vesca]	WRKY	-2.65514	/	-3.77957	-1.65974
RchiOBHm_Chr3g0487201	WRKY23	PREDICTED: probable WRKY transcription factor 23 [Fragaria vesca subsp. vesca] [Fragaria vesca]	WRKY	/	-1.14392	-1.98232	/
RchiOBHm_Chr7g0241041	WRKY35	PREDICTED: probable WRKY transcription factor 65 [Fragaria vesca subsp. vesca] [Fragaria vesca]	WRKY	/	-1.08833	/	/
RchiOBHm_Chr4g0438661	WRKY57	PREDICTED: probable WRKY transcription factor 57 isoform X2 [Fragaria vesca subsp. vesca] [Fragaria vesca]	WRKY	/	-1.57901	-3.61056	/
RchiOBHm_Chr6g0289301	WRKY21	PREDICTED: probable WRKY transcription factor 21 isoform X2 [Fragaria vesca subsp. vesca] [Fragaria vesca]	WRKY	/	/	-1.57978	/
RchiOBHm_Chr2g0167461	NAC100	NAC domain protein 100 [Rosa hybrid cultivar]	NAC	/	1.50499	7.20284	/
RchiOBHm_Chr3g0497471	NAC087	PREDICTED: NAC domain-containing protein 77-like [Fragaria vesca subsp. vesca] [Fragaria vesca]	NAC	/	1.06515	3.50669	/
RchiOBHm_Chr4g0400541	NAC067	PREDICTED: NAC domain-containing protein 83-like isoform X2 [Prunus mume]	NAC	/	/	1.18331	-1.21723
RchiOBHm_Chr4g0438571	NAC101	PREDICTED: NAC domain-containing protein 68-like [Fragaria vesca subsp. vesca] [Fragaria vesca]	NAC	-1.01268	/	/	/
RchiOBHm_Chr4g0439451	NAC029	PREDICTED: NAC transcription factor 29-like [Fragaria vesca subsp. vesca] [Fragaria vesca]	NAC	/	1.58614	3.55237	/
RchiOBHm_Chr5g0009331	NAC073	PREDICTED: NAC domain-containing protein 8 isoform X1 [Fragaria vesca subsp. vesca] [Fragaria vesca]	NAC	2.72875	2.07504	4.84528	3.3979
RchiOBHm_Chr5g0027011	NAC021	PREDICTED: NAC domain-containing protein 21/22-like isoform X1 [Fragaria vesca subsp. vesca] [Fragaria vesca]	NAC	-2.82997	/	2.69691	-2.40801
RchiOBHm_Chr5g0034761	NAC072	PREDICTED: NAC domain-containing protein 72-like [Fragaria vesca subsp. vesca] [Fragaria vesca]	NAC	-1.04708	2.83579	5.5311	/
RchiOBHm_Chr5g0034821	NAC056	PREDICTED: NAC domain-containing protein 18-like [Fragaria vesca subsp. vesca] [Fragaria vesca]	NAC	-3.13516	-2.42292	1.23057	-2.51026
RchiOBHm_Chr6g0266631	NAC101	PREDICTED: transcription factor JUNGBRUNNEN 1-like [Fragaria vesca subsp. vesca] [Fragaria vesca]	NAC	/	-1.73697	2.3505	/
RchiOBHm_Chr6g0308271	NAC072	PREDICTED: NAC domain-containing protein 72-like [Fragaria vesca subsp. vesca] [Fragaria vesca]	NAC	/	/	1.26693	/
RchiOBHm_Chr7g0177481	NAC086	PREDICTED: NAC domain-containing protein 86 [Fragaria vesca subsp. vesca] [Fragaria vesca]	NAC	/	/	-5.06301	/
RchiOBHm_Chr7g0181751	NAC100	NAC2 protein [Rosa hybrid cultivar]	NAC	-2.41586	/	3.742	-4.38986
RchiOBHm_Chr1g0361691	NAC014	PREDICTED: NAC transcription factor 25-like [Fragaria vesca subsp. vesca] [Fragaria vesca]	NAC	-1.41504	/	-3.32193	/
RchiOBHm_Chr3g0482951	NAC019	PREDICTED: NAC transcription factor 32-like [Ipomoea nil]	NAC	1.28951	3.74894	3.59826	-1.58496
RchiOBHm_Chr7g0218501	NAC035	PREDICTED: NAC domain-containing protein 48 [Fragaria vesca subsp. vesca] [Fragaria vesca]	NAC	/	-1.6419	-2.55403	/
RchiOBHm_Chr0c19g0500091	NAC073	PREDICTED: NAC domain-containing protein 8-like [Fragaria vesca subsp. vesca] [Fragaria vesca]	NAC	5.57652	4.98368	-2.64386	6.96209
RchiOBHm_Chr1g0360971	NAC043	PREDICTED: NAC domain-containing protein 43-like [Fragaria vesca subsp. vesca] [Fragaria vesca]	NAC	2.97534	2.57268	-5.29768	4.15353
RchiOBHm_Chr1g0361391	NAC086	PREDICTED: NAC domain-containing protein 4-like isoform X1 [Fragaria vesca subsp. vesca] [Fragaria vesca]	NAC	-1.35614	/	-2.31818	/
RchiOBHm_Chr1g0361531	NAC014	PREDICTED: NAC domain-containing protein 4-like isoform X2 [Fragaria vesca subsp. vesca] [Fragaria vesca]	NAC	/	/	-3.27302	1.64981
RchiOBHm_Chr3g0488761	NAC086	PREDICTED: NAC domain-containing protein 86 isoform X1 [Fragaria vesca subsp. vesca] [Fragaria vesca]	NAC	1.30933	/	-2.20163	2.40718
RchiOBHm_Chr7g0187451	NAC043	PREDICTED: NAC domain-containing protein 43-like [Fragaria vesca subsp. vesca] [Fragaria vesca]	NAC	5.02333	3.07635	-2.9386	5.3235
RchiOBHm_Chr7g0202191	NAC007	PREDICTED: NAC domain-containing protein 7 [Fragaria vesca subsp. vesca] [Fragaria vesca]	NAC	2.5025	4.05889	3.27302	5.48113
RchiOBHm_Chr1g0361471	NAC083	PREDICTED: NAC domain-containing protein 4-like isoform X1 [Fragaria vesca subsp. vesca] [Fragaria vesca]	NAC	/	/	-2.56294	/
RchiOBHm_Chr2g0099671	NAC037	PREDICTED: NAC domain-containing protein 7 [Fragaria vesca subsp. vesca] [Fragaria vesca]	NAC	2.52655	1.34465	-3.07039	2.32193
RchiOBHm_Chr6g0271921	NAC086	PREDICTED: protein ATAF2-like [Fragaria vesca subsp. vesca] [Fragaria vesca]	NAC	-2.67243	/	/	-3.67243
RchiOBHm_Chr6g0296281	NAC002	PREDICTED: NAC domain-containing protein 2 [Fragaria vesca subsp. vesca] [Fragaria vesca]	NAC	-1.25692	1.47519	2.25761	-1.29897
RchiOBHm_Chr7g0189281	NAC083	PREDICTED: NAC transcription factor 29 [Fragaria vesca subsp. vesca] [Fragaria vesca]	NAC	/	/	-4.245	/
RchiOBHm_Chr7g0209171	NAC071	PREDICTED: protein ATAF2-like [Fragaria vesca subsp. vesca] [Fragaria vesca]	NAC	1.06399	-1.92453	-1.13604	-1.86994
RchiOBHm_Chr7g0216521	NAC031	PREDICTED: protein CUP-SHAPED COTYLEDON 2 [Fragaria vesca subsp. vesca] [Fragaria vesca]	NAC	3.87447	2.73697	2	2.58496
RchiOBHm_Chr1g0361701	NAC014	PREDICTED: NAC transcription factor 25-like [Fragaria vesca subsp. vesca] [Fragaria vesca]	NAC	-1.35641	1.65608	-2.79859	1.10115
RchiOBHm_Chr1g0374531	NAC007	PREDICTED: NAC domain-containing protein 7-like [Fragaria vesca subsp. vesca] [Fragaria vesca]	NAC	7.67419	7.60733	/	8.02929
RchiOBHm_Chr6g0279801	NAC022	PREDICTED: NAC transcription factor 29 [Fragaria vesca subsp. vesca] [Fragaria vesca]	NAC	-1.23855	/	-3.5832	1.0783
RchiOBHm_Chr1g0334901	NAC078	PREDICTED: NAC domain-containing protein 78 isoform X2 [Fragaria vesca subsp. vesca] [Fragaria vesca]	NAC	/	/	/	/
RchiOBHm_Chr1g0383091	NAC091	PREDICTED: NAC domain-containing protein 86 [Fragaria vesca subsp. vesca] [Fragaria vesca]	NAC	-2.66448	1.12893	-1.46441	/
RchiOBHm_Chr2g0122871	NAC081	PREDICTED: NAC domain-containing protein 2-like [Fragaria vesca subsp. vesca] [Fragaria vesca]	NAC	-3.11358	1.09557	/	-1.98229
RchiOBHm_Chr3g0474741	NAC090	PREDICTED: NAC domain-containing protein 90-like [Fragaria vesca subsp. vesca] [Fragaria vesca]	NAC	/	1.8761	-2.24345	/
RchiOBHm_Chr6g0273431	NAC017	PREDICTED: NAC domain-containing protein 86-like [Fragaria vesca subsp. vesca] [Fragaria vesca]	NAC	/	1.09331	/	/
RchiOBHm_Chr6g0287861	NAC021	PREDICTED: protein CUP-SHAPED COTYLEDON 3-like [Fragaria vesca subsp. vesca] [Fragaria vesca]	NAC	/	1.02837	-2.18688	-1.05497
RchiOBHm_Chr2g0176181	NAC041	PREDICTED: protein SOMBRERO-like [Fragaria vesca subsp. vesca] [Fragaria vesca]	NAC	/	/	-4.1964	-2.45943
RchiOBHm_Chr5g0045711	NAC101	PREDICTED: transcription factor JUNGBRUNNEN 1-like [Fragaria vesca subsp. vesca] [Fragaria vesca]	NAC	-1.43741	-1.11548	/	/
RchiOBHm_Chr7g0205441	NAC104	PREDICTED: NAC transcription factor ONAC010-like [Fragaria vesca subsp. vesca] [Fragaria vesca]	NAC	-1.46503	-2.0686	/	/
RchiOBHm_Chr5g0023211	NAC086	PREDICTED: NAC domain-containing protein 86 [Fragaria vesca subsp. vesca] [Fragaria vesca]	NAC	/	/	-3.11548	/
RchiOBHm_Chr3g0470381	MYB36	PREDICTED: transcription factor RAX2 [Fragaria vesca subsp. vesca] [Fragaria vesca]	MYB	-2.36457	-2.6865	-2.31146	-1.70922
RchiOBHm_Chr5g0021591	MYB61	PREDICTED: transcription factor MYB46-like [Fragaria vesca subsp. vesca] [Fragaria vesca]	MYB	-4.85798	-2.05063	-4.85798	-1.35548
RchiOBHm_Chr7g0234171	MYB63	PREDICTED: myb-related protein Myb4-like [Citrus sinensis]	MYB	-4.78724	-1.37059	-6.42467	-1.57064
RchiOBHm_Chr5g0025771	MYB63	PREDICTED: myb-related protein 330 [Fragaria vesca subsp. vesca] [Fragaria vesca]	MYB	-1.06012	-3.44478	/	-2.09115
RchiOBHm_Chr5g0062851	MYB59	PREDICTED: transcription factor MYB59 [Fragaria vesca subsp. vesca] [Fragaria vesca]	MYB	/	-1.06678	/	-1.69941
RchiOBHm_Chr3g0470621	MYB27	PREDICTED: transcription factor MYB59 [Fragaria vesca subsp. vesca] [Fragaria vesca]	MYB	-2.34104	/	/	-1.63322
RchiOBHm_Chr4g0392981	MYB14	PREDICTED: myb-related protein Myb4-like [Fragaria vesca subsp. vesca] [Fragaria vesca]	MYB	-1.98346	-1.31486	/	-1.90059
RchiOBHm_Chr1g0370581	MYB73	PREDICTED: transcriptional activator Myb-like [Malus domestica]	MYB	-3.29278	-1.02975	/	-4.02975
RchiOBHm_Chr3g0464251	MYB1	PREDICTED: transcription factor LAF1 [Fragaria vesca subsp. vesca] [Fragaria vesca]	MYB	/	-1.30847	/	/
RchiOBHm_Chr6g0310231	RAX3	PREDICTED: transcription factor RAX3-like [Fragaria vesca subsp. vesca] [Fragaria vesca]	MYB	/	-2.24393	1.39689	/
RchiOBHm_Chr5g0075031	MYB80	PREDICTED: myb-related protein 315 [Fragaria vesca subsp. vesca] [Fragaria vesca]	MYB	-2.16992	/	1.54432	-3.58496
RchiOBHm_Chr2g0140461	MYBS3	PREDICTED: transcription factor MYB1R1 [Fragaria vesca subsp. vesca] [Fragaria vesca]	MYB	/	2.21702	2.55832	/
RchiOBHm_Chr2g0169671	MYB35	PREDICTED: transcription factor RAX2 isoform X1 [Fragaria vesca subsp. vesca] [Fragaria vesca]	MYB	/	1.73697	2.46815	-1.20645
RchiOBHm_Chr7g0185561	MYB62	PREDICTED: transcription factor MYB108-like [Fragaria vesca subsp. vesca] [Fragaria vesca]	MYB	-1.18526	3.18364	3.91877	/
RchiOBHm_Chr7g0178691	MYB3	PREDICTED: transcription factor MYB3-like [Fragaria vesca subsp. vesca] [Fragaria vesca]	MYB	-1.39799	/	1.01942	-1.14493
RchiOBHm_Chr4g0434891	MYB62	PREDICTED: transcription factor MYB24 [Fragaria vesca subsp. vesca] [Fragaria vesca]	MYB	-3.80735	/	2.86035	-2.07039
RchiOBHm_Chr2g0116041	MYB75	R2R3 MYB transcription factor [Fragaria x ananassa]	MYB	-1.09954	1.67807	7.65296	/
RchiOBHm_Chr5g0006031	MYB102	PREDICTED: protein ODORANT1-like [Fragaria vesca subsp. vesca] [Fragaria vesca]	MYB	/	1.37971	4.58224	1.34777
RchiOBHm_Chr7g0228621	MYB330	PREDICTED: transcription repressor MYB6 [Fragaria vesca subsp. vesca] [Fragaria vesca]	MYB	/	/	3.38466	/
RchiOBHm_Chr2g0161391	MYB102	PREDICTED: transcription repressor MYB6-like [Fragaria vesca subsp. vesca] [Fragaria vesca]	MYB	/	/	3.28306	/
RchiOBHm_Chr7g0210281	MYB39	PREDICTED: transcription factor MYB39 [Fragaria vesca subsp. vesca] [Fragaria vesca]	MYB	/	/	3.79385	-2.9386
RchiOBHm_Chr7g0204081	MYBS3	PREDICTED: transcription factor MYB1R1 [Fragaria vesca subsp. vesca] [Fragaria vesca]	MYB	/	/	2.34267	/
RchiOBHm_Chr4g0426181	MYB78	PREDICTED: transcription factor MYB108 [Fragaria vesca subsp. vesca] [Fragaria vesca]	MYB	-1.70027	1.66319	4.13374	-1.698
RchiOBHm_Chr1g0354061	MYB17	PREDICTED: transcription repressor MYB6 [Fragaria vesca subsp. vesca] [Fragaria vesca]	MYB	/	1.13245	/	/
RchiOBHm_Chr7g0193591	MYB23	PREDICTED: trichome differentiation protein GL1-like [Fragaria vesca subsp. vesca] [Fragaria vesca]	MYB	2.39046	2.23349	/	1.73306
RchiOBHm_Chr2g0161281	MYB14	PREDICTED: transcription factor WER-like [Fragaria vesca subsp. vesca] [Fragaria vesca]	MYB	4.71882	4.62449	3.41504	4.02975
RchiOBHm_Chr3g0491061	MYB20	PREDICTED: protein ODORANT1-like [Fragaria vesca subsp. vesca] [Fragaria vesca]	MYB	/	/	-1.33474	-1.58563
RchiOBHm_Chr6g0288151	MYB4	PREDICTED: myb-related protein Myb4 [Fragaria vesca subsp. vesca] [Fragaria vesca]	MYB	-1.38475	1.57803	/	/
RchiOBHm_Chr2g0161271	MYB14	PREDICTED: myb-related protein Myb4-like [Fragaria vesca subsp. vesca] [Fragaria vesca]	MYB	-3.89905	1.20081	-5.74265	-1.10299
RchiOBHm_Chr6g0255341	MYB73	PREDICTED: transcription factor MYB44-like [Fragaria vesca subsp. vesca] [Fragaria vesca]	MYB	-4.83036	/	-4.4864	/
RchiOBHm_Chr6g0308731	MYB73	PREDICTED: transcription factor MYB44-like [Fragaria vesca subsp. vesca] [Fragaria vesca]	MYB	-2.20138	/	-1.64999	/
RchiOBHm_Chr6g0307001	MYB73	PREDICTED: transcription factor MYB44-like [Fragaria vesca subsp. vesca] [Fragaria vesca]	MYB	-2.05018	2.02587	-6.13981	1.28581
RchiOBHm_Chr2g0106671	MYB73	PREDICTED: transcription factor MYB44-like [Fragaria vesca subsp. vesca] [Fragaria vesca]	MYB	/	2.31663	/	1.32594
RchiOBHm_Chr5g0005721	MYB4	PREDICTED: myb-related protein Myb4-like [Fragaria vesca subsp. vesca] [Fragaria vesca]	MYB	/	-1.152	-1.13079	1.15704
RchiOBHm_Chr1g0360311	MYB3	transcriptional activator Myb [Fragaria vesca]	MYB	1.09052	1.88652	/	2.71248
RchiOBHm_Chr3g0458721	MYB61	PREDICTED: transcription factor MYB86 [Fragaria vesca subsp. vesca] [Fragaria vesca]	MYB	1.99122	/	-6.10154	1.80935
RchiOBHm_Chr6g0304811	MYB3	transcription factor MYB28-like [Fragaria vesca]	MYB	3.13314	1.50286	-3.1089	2.75427
RchiOBHm_Chr7g0198881	MYB3R4	PREDICTED: myb-related protein 306-like [Fragaria vesca subsp. vesca] [Fragaria vesca]	MYB	2.23704	/	-2.80735	2.17754
RchiOBHm_Chr1g0315931	MYB46	PREDICTED: transcription factor MYB46 [Fragaria vesca subsp. vesca] [Fragaria vesca]	MYB	7.08746	5.79008	/	7.54689
RchiOBHm_Chr7g0177631	MYB52	PREDICTED: transcriptional activator Myb [Fragaria vesca subsp. vesca] [Fragaria vesca]	MYB	3.24878	1.18248	/	3.50583
RchiOBHm_Chr7g0192781	MYB86	PREDICTED: transcription factor MYB86-like [Fragaria vesca subsp. vesca] [Fragaria vesca]	MYB	1.77429	/	-5.17991	2.42186
RchiOBHm_Chr2g0168581	MYB306	PREDICTED: myb-related protein 306 [Fragaria vesca subsp. vesca] [Fragaria vesca]	MYB	/	/	-2.1445	/
RchiOBHm_Chr4g0440161	MYB88	PREDICTED: myb-related protein 315-like isoform X1 [Fragaria vesca subsp. vesca] [Fragaria vesca]	MYB	/	/	-2.62449	/
RchiOBHm_Chr4g0396001	MYB2	PREDICTED: myb-related protein 305 isoform X1 [Fragaria vesca subsp. vesca] [Fragaria vesca]	MYB	/	/	-3.70044	/
RchiOBHm_Chr2g0116071	MYB75	R2R3 MYB transcription factor [Rubus idaeus]	MYB	/	-2.74894	-5.3339	-2.67094
RchiOBHm_Chr3g0473591	RAX3	PREDICTED: LOW QUALITY PROTEIN: transcription factor RAX1-like [Fragaria vesca subsp. vesca] [Fragaria vesca]	MYB	/	-2.07708	-4.62727	/
RchiOBHm_Chr2g0113131	MYB93	PREDICTED: transcription factor MYB28-like [Fragaria vesca subsp. vesca] [Fragaria vesca]	MYB	/	-1.44057	-3.66297	-2.926
RchiOBHm_Chr4g0441081	MYB4	PREDICTED: transcription repressor MYB6-like [Fragaria vesca subsp. vesca] [Fragaria vesca]	MYB	/	-1.7213	-1.32322	/
RchiOBHm_Chr2g0087781	MYB82	PREDICTED: trichome differentiation protein GL1-like [Fragaria vesca subsp. vesca] [Fragaria vesca]	MYB	2.67722	/	-4.19741	1.33097
RchiOBHm_Chr7g0181361	MYB306	PREDICTED: myb-related protein 306-like isoform X1 [Fragaria vesca subsp. vesca] [Fragaria vesca]	MYB	1.66433	/	-1.48932	/
RchiOBHm_Chr6g0252211	MYB308	R2R3-MYB [Rosa hybrid cultivar]	MYB	/	-1.25297	-4.9698	/
RchiOBHm_Chr7g0178681	MYB308	PREDICTED: myb-related protein 308-like [Fragaria vesca subsp. vesca] [Fragaria vesca]	MYB	/	/	-1.86226	/
RchiOBHm_Chr7g0181001	bHLH062	PREDICTED: transcription factor bHLH47 [Fragaria vesca subsp. vesca] [Fragaria vesca]	bHLH	/	/	/	/
RchiOBHm_Chr7g0210101	bHLH71	PREDICTED: transcription factor bHLH71 [Fragaria vesca subsp. vesca] [Fragaria vesca]	bHLH	-1	2.45943	2.16993	/
RchiOBHm_Chr7g0193761	bHLH162	PREDICTED: transcription factor bHLH100-like [Fragaria vesca subsp. vesca] [Fragaria vesca]	bHLH	-3.01696	1.28039	-4.11789	/
RchiOBHm_Chr4g0399211	bHLH35	PREDICTED: transcription factor bHLH35 [Fragaria vesca subsp. vesca] [Fragaria vesca]	bHLH	-1.09185	4.28835	-2.1641	1.88714
RchiOBHm_Chr2g0126861	bHLH162	PREDICTED: transcription factor bHLH118-like isoform X2 [Fragaria vesca subsp. vesca] [Fragaria vesca]	bHLH	/	3.78366	/	0.469881
RchiOBHm_Chr4g0390311	bHLH92	PREDICTED: transcription factor bHLH92 [Fragaria vesca subsp. vesca] [Fragaria vesca]	bHLH	-1.19692	4.65686	-1.58745	1.12235
RchiOBHm_Chr2g0109621	bHLH25	PREDICTED: transcription factor bHLH18-like [Fragaria vesca subsp. vesca] [Fragaria vesca]	bHLH	2.90689	2.45943	2.80735	2.16993
RchiOBHm_Chr7g0187261	bHLH14	PREDICTED: transcription factor MYC2-like isoform X1 [Prunus mume]	bHLH	4.45943	3.58496	4.16993	4.08746
RchiOBHm_Chr2g0099391	bHLH121	PREDICTED: transcription factor bHLH121 [Fragaria vesca subsp. vesca] [Fragaria vesca]	bHLH	/	/	/	/
RchiOBHm_Chr3g0480621	bHLH130	PREDICTED: transcription factor bHLH130 [Fragaria vesca subsp. vesca] [Fragaria vesca]	bHLH	/	-1.26075	/	/
RchiOBHm_Chr5g0010631	bHLH30	PREDICTED: transcription factor bHLH106-like [Fragaria vesca subsp. vesca] [Fragaria vesca]	bHLH	/	/	2.07358	-1.11884
RchiOBHm_Chr1g0314891	bHLH130	PREDICTED: transcription factor bHLH130-like [Fragaria vesca subsp. vesca] [Fragaria vesca]	bHLH	/	/	1.31014	/
RchiOBHm_Chr1g0365881	bHLH154	PREDICTED: transcription factor bHLH111-like isoform X2 [Prunus mume]	bHLH	/	/	1.08064	/
RchiOBHm_Chr6g0301601	bHLH110	PREDICTED: transcription factor bHLH110 [Fragaria vesca subsp. vesca] [Fragaria vesca]	bHLH	/	/	/	/
RchiOBHm_Chr2g0091241	bHLH68	PREDICTED: transcription factor bHLH68 [Fragaria vesca subsp. vesca] [Fragaria vesca]	bHLH	/	/	/	/
RchiOBHm_Chr4g0392401	bHLH104	PREDICTED: transcription factor bHLH104 [Fragaria vesca subsp. vesca] [Fragaria vesca]	bHLH	/	/	/	/
RchiOBHm_Chr7g0238141	bHLH96	PREDICTED: transcription factor bHLH96 [Fragaria vesca subsp. vesca] [Fragaria vesca]	bHLH	1.49957	/	/	/
RchiOBHm_Chr1g0361191	bHLH67	PREDICTED: transcription factor bHLH57-like [Fragaria vesca subsp. vesca] [Fragaria vesca]	bHLH	2.13245	/	-3.70044	/
RchiOBHm_Chr3g0480751	bHLH48	PREDICTED: transcription factor bHLH48 [Fragaria vesca subsp. vesca] [Fragaria vesca]	bHLH	1.42784	/	/	/
RchiOBHm_Chr4g0445691	bHLH111	PREDICTED: transcription factor bHLH111 isoform X4 [Fragaria vesca subsp. vesca] [Fragaria vesca]	bHLH	1.97797	-1.1375	-5.04439	-1.1375
RchiOBHm_Chr6g0246251	bHLH25	PREDICTED: transcription factor bHLH18-like [Fragaria vesca subsp. vesca] [Fragaria vesca]	bHLH	1.1587	/	-1.8413	/
RchiOBHm_Chr2g0085911	bHLH66	PREDICTED: transcription factor bHLH66-like [Fragaria vesca subsp. vesca] [Fragaria vesca]	bHLH	/	/	-1.77813	/
RchiOBHm_Chr4g0405961	bHLH153	PREDICTED: transcription factor bHLH113 isoform X1 [Prunus mume]	bHLH	/	/	-1.50663	/
RchiOBHm_Chr7g0182341	bHLH72	PREDICTED: transcription factor PIF7 isoform X2 [Fragaria vesca subsp. vesca] [Fragaria vesca]	bHLH	/	-2.26096	-6.85591	/
RchiOBHm_Chr5g0077341	bHLH122	PREDICTED: transcription factor bHLH122-like [Fragaria vesca subsp. vesca] [Fragaria vesca]	bHLH	/	-1.03045	-3.19108	-1.10117
RchiOBHm_Chr3g0457291	bHLH149	PREDICTED: transcription factor bHLH147-like [Fragaria vesca subsp. vesca] [Fragaria vesca]	bHLH	/	-1.05385	-1.61225	-1.25381
RchiOBHm_Chr4g0412071	bHLH62	PREDICTED: transcription factor bHLH77-like [Fragaria vesca subsp. vesca] [Fragaria vesca]	bHLH	1.71145	/	-3.8709	/
RchiOBHm_Chr6g0310101	bHLH74	PREDICTED: transcription factor bHLH74 [Fragaria vesca subsp. vesca] [Fragaria vesca]	bHLH	1.89145	/	-5.08746	1.2826
RchiOBHm_Chr6g0264701	bHLH63	PREDICTED: transcription factor bHLH63 [Fragaria vesca subsp. vesca] [Fragaria vesca]	bHLH	/	-2.25452	-4.95365	/
RchiOBHm_Chr2g0139261	bHLH68	PREDICTED: transcription factor bHLH68-like isoform X2 [Prunus mume]	bHLH	/	/	-1.68589	/
RchiOBHm_Chr4g0409001	bHLH128	PREDICTED: transcription factor bHLH128 isoform X1 [Fragaria vesca subsp. vesca] [Fragaria vesca]	bHLH	/	/	-1.31324	/
RchiOBHm_Chr4g0435901	bHLH30	PREDICTED: transcription factor bHLH30 [Fragaria vesca subsp. vesca] [Fragaria vesca]	bHLH	/	/	/	/
RchiOBHm_Chr6g0245181	bHLH121	PREDICTED: transcription factor bHLH121 [Fragaria vesca subsp. vesca] [Fragaria vesca]	bHLH	/	/	/	1.17757
RchiOBHm_Chr6g0283511	bHLH62	PREDICTED: transcription factor bHLH62 [Fragaria vesca subsp. vesca] [Fragaria vesca]	bHLH	2.41504	/	/	2.19033
RchiOBHm_Chr7g0236841	bHLH30	PREDICTED: transcription factor bHLH30-like [Malus domestica]	bHLH	2.16993	-1	-3.32193	1.848
RchiOBHm_Chr5g0008581	bHLH162	PREDICTED: transcription factor bHLH126 [Fragaria vesca subsp. vesca] [Fragaria vesca]	bHLH	/	/	-1.91632	2.60158
RchiOBHm_Chr2g0109941	bHLH93	PREDICTED: transcription factor bHLH93-like [Fragaria vesca subsp. vesca] [Fragaria vesca]	bHLH	/	-2	-3.1375	/
RchiOBHm_Chr5g0008601	bHLH162	PREDICTED: transcription factor bHLH126 [Fragaria vesca subsp. vesca] [Fragaria vesca]	bHLH	/	-3.21501	-2.11548	/
RchiOBHm_Chr4g0437041	bHLH49	PREDICTED: transcription factor bHLH49 [Fragaria vesca subsp. vesca] [Fragaria vesca]	bHLH	/	/	-2.01894	/
RchiOBHm_Chr6g0254731	bHLH113	PREDICTED: transcription factor bHLH113-like isoform X1 [Fragaria vesca subsp. vesca] [Fragaria vesca]	bHLH	/	/	-3.13614	/
RchiOBHm_Chr4g0445091	bHLH094	PREDICTED: transcription factor bHLH79 isoform X1 [Fragaria vesca subsp. vesca] [Fragaria vesca]	bHLH	/	/	/	/
RchiOBHm_Chr6g0288981	bHLH3	PREDICTED: transcription factor bHLH3 [Fragaria vesca subsp. vesca] [Fragaria vesca]	bHLH	/	/	/	/
RchiOBHm_Chr2g0160481	bHLH117	PREDICTED: transcription factor bHLH117 [Ziziphus jujuba]	bHLH	-1.41871	/	-1.54157	-2.17544
RchiOBHm_Chr6g0268091	bHLH3	PREDICTED: transcription factor bHLH3 [Fragaria vesca subsp. vesca] [Fragaria vesca]	bHLH	/	/	/	/
RchiOBHm_Chr1g0370561	bHLH51	PREDICTED: transcription factor bHLH51 [Fragaria vesca subsp. vesca] [Fragaria vesca]	bHLH	-1.0184	-2.59163	-6.59163	-1.95098
RchiOBHm_Chr7g0189021	bHLH137	PREDICTED: transcription factor bHLH137 [Fragaria vesca subsp. vesca] [Fragaria vesca]	bHLH	-1.60918	-2.499	-4.23597	-3.71857
RchiOBHm_Chr2g0109611	bHLH25	PREDICTED: transcription factor bHLH18-like [Fragaria vesca subsp. vesca] [Fragaria vesca]	bHLH	-3.58496	-1.26303	-3.58496	-1.58496
RchiOBHm_Chr7g0227911	bHLH80	PREDICTED: transcription factor bHLH80-like [Fragaria vesca subsp. vesca] [Fragaria vesca]	bHLH	-1.04991	-1.02566	-1.24175	-1.13614
RchiOBHm_Chr7g0233161	bHLH93	PREDICTED: transcription factor bHLH93-like [Fragaria vesca subsp. vesca] [Fragaria vesca]	bHLH	-2.61788	-3.39232	-3.64024	-2.04033
RchiOBHm_Chr4g0405511	bHLH089	PREDICTED: transcription factor bHLH79 isoform X2 [Fragaria vesca subsp. vesca] [Fragaria vesca]	bHLH	/	1	-1.90689	/
RchiOBHm_Chr5g0053301	bHLH106	PREDICTED: transcription factor bHLH106 [Fragaria vesca subsp. vesca] [Fragaria vesca]	bHLH	/	/	/	/
RchiOBHm_Chr7g0180121	bHLH094	PREDICTED: transcription factor bHLH79 isoform X1 [Fragaria vesca subsp. vesca] [Fragaria vesca]	bHLH	/	/	-1.43236	/
RchiOBHm_Chr1g0337011	bHLH10	PREDICTED: transcription factor bHLH91-like [Fragaria vesca subsp. vesca] [Fragaria vesca]	bHLH	/	/	-1.47107	-1.18677
RchiOBHm_Chr1g0360001	bHLH13	PREDICTED: transcription factor bHLH13-like [Fragaria vesca subsp. vesca] [Fragaria vesca]	bHLH	/	1.225	-1.73283	/
RchiOBHm_Chr5g0004831	bHLH123	PREDICTED: transcription factor bHLH112 isoform X3 [Fragaria vesca subsp. vesca] [Fragaria vesca]	bHLH	/	/	-2.31677	/
RchiOBHm_Chr5g0044421	TGA9	PREDICTED: transcription factor TGA6 isoform X3 [Fragaria vesca subsp. vesca] [Fragaria vesca]	bZIP	/	-1.44815	-2.31064	/
RchiOBHm_Chr6g0265831	bZIP44	PREDICTED: ocs element-binding factor 1 [Fragaria vesca subsp. vesca] [Fragaria vesca]	bZIP	/	-1.98926	-3.36135	/
RchiOBHm_Chr1g0318951	bZIP24	PREDICTED: basic leucine zipper 23 [Pyrus x bretschneideri]	bZIP	/	/	-1.7691	/
RchiOBHm_Chr1g0372151	bZIP18	PREDICTED: transcription factor RF2b [Fragaria vesca subsp. vesca] [Fragaria vesca]	bZIP	/	/	-2.5204	/
RchiOBHm_Chr4g0436911	bZIP43	PREDICTED: basic leucine zipper 43 [Fragaria vesca subsp. vesca] [Fragaria vesca]	bZIP	1	/	-3.45943	/
RchiOBHm_Chr5g0031811	bZIP34	PREDICTED: basic leucine zipper 61-like isoform X2 [Prunus mume]	bZIP	4.14296	1.73697	2.58496	4.87447
RchiOBHm_Chr5g0073151	RF2b	PREDICTED: transcription factor RF2b-like [Fragaria vesca subsp. vesca] [Fragaria vesca]	bZIP	3.40228	2.02277	1.16115	3.55403
RchiOBHm_Chr2g0128811	bZIP61	PREDICTED: basic leucine zipper 34 [Fragaria vesca subsp. vesca] [Fragaria vesca]	bZIP	2.16993	/	-1	2.27302
RchiOBHm_Chr4g0433931	bZIP17	PREDICTED: bZIP transcription factor 17-like, partial [Pyrus x bretschneideri]	bZIP	-1.95328	/	/	/
RchiOBHm_Chr7g0217321	bZIP60	PREDICTED: bZIP transcription factor 60 [Fragaria vesca subsp. vesca] [Fragaria vesca]	bZIP	-2.74696	/	/	-1.21247
RchiOBHm_Chr4g0435611	PAN	perianthia [Rosa chinensis]	bZIP	-1.33867	/	-1.46089	/
RchiOBHm_Chr2g0100571	bZIP53	PREDICTED: ocs element-binding factor 1-like [Fragaria vesca subsp. vesca] [Fragaria vesca]	bZIP	-2.84741	-4.51918	-4.7957	-4.30159
RchiOBHm_Chr2g0115911	TGA4	PREDICTED: transcription factor TGA4-like isoform X1 [Fragaria vesca subsp. vesca] [Fragaria vesca]	bZIP	-1.98942	-2.13301	-1.64041	-2.56429
RchiOBHm_Chr6g0275921	VIP1	PREDICTED: transcription factor VIP1 [Fragaria vesca subsp. vesca] [Fragaria vesca]	bZIP	/	1.04827	1.22816	/
RchiOBHm_Chr7g0224461	GBF4	PREDICTED: G-box-binding factor 4-like [Fragaria vesca subsp. vesca] [Fragaria vesca]	bZIP	/	1.11941	1.15629	/
RchiOBHm_Chr3g0451141	CPRF2	PREDICTED: light-inducible protein CPRF2 [Fragaria vesca subsp. vesca] [Fragaria vesca]	bZIP	/	/	1.4715	/
RchiOBHm_Chr6g0305501	bZIP9	PREDICTED: basic leucine zipper 9 [Fragaria vesca subsp. vesca] [Fragaria vesca]	bZIP	/	/	2.30978	/
RchiOBHm_Chr2g0164231	bZIP43	PREDICTED: basic leucine zipper 43 [Fragaria vesca subsp. vesca] [Fragaria vesca]	bZIP	-1.4039	-1.23644	1.08153	-1.8413
RchiOBHm_Chr6g0309961	bZIP53	PREDICTED: ocs element-binding factor 1 [Fragaria vesca subsp. vesca] [Fragaria vesca]	bZIP	/	-3.54844	/	-5.2854
RchiOBHm_Chr1g0371151	DREB2A	PREDICTED: dehydration-responsive element-binding protein 2A-like [Fragaria vesca subsp. vesca] [Fragaria vesca]	DREB	-3.84891	/	1.6306	/
RchiOBHm_Chr2g0091471	DREB3	PREDICTED: ethylene-responsive transcription factor TINY [Fragaria vesca subsp. vesca] [Fragaria vesca]	DREB	/	/	-5.80871	/
RchiOBHm_Chr7g0199381	DREB1A	PREDICTED: dehydration-responsive element-binding protein 1E [Fragaria vesca subsp. vesca] [Fragaria vesca]	DREB	-6.59352	-2.5839	-6.40088	-3.80097
RchiOBHm_Chr7g0199251	DREB1D	dehydration-responsive element-binding protein 1A [Rosa hybrid cultivar]	DREB	-6.62461	-1.27235	-4.23918	-3.5715
RchiOBHm_Chr7g0199301	DREB1D	dehydration-responsive element-binding protein 1A [Rosa hybrid cultivar]	DREB	-6.75332	/	-6.25582	-2.65838
RchiOBHm_Chr7g0199331	DREB1D	dehydration-responsive element-binding protein 1A [Rosa hybrid cultivar]	DREB	-6.74147	-1.3413	-5.98658	-2.47156
RchiOBHm_Chr7g0199351	DREB1D	dehydration-responsive element-binding protein 1A [Rosa hybrid cultivar]	DREB	-9.64145	/	-4.88656	-4.20404
RchiOBHm_Chr2g0139661	DREB3	PREDICTED: ethylene-responsive transcription factor TINY [Fragaria vesca subsp. vesca] [Fragaria vesca]	DREB	1.14534	-1.79577	-3.90357	1.19119
RchiOBHm_Chr6g0306191	DREB3	PREDICTED: dehydration-responsive element-binding protein 3-like [Fragaria vesca subsp. vesca] [Fragaria vesca]	DREB	2.27738	-1.27486	-8.35168	1.15215
RchiOBHm_Chr3g0472361	DREB1B	PREDICTED: dehydration-responsive element-binding protein 1B-like [Fragaria vesca subsp. vesca] [Fragaria vesca]	DREB	/	/	-6.3443	1.46949
RchiOBHm_Chr6g0312551	DREB2A	PREDICTED: dehydration-responsive element-binding protein 2A-like isoform X2 [Juglans regia]	DREB	1.67807	1.37851	/	2.20163
RchiOBHm_Chr1g0376641	DREB1B	dehydration-responsive element-binding protein 1B [Rosa hybrid cultivar]	DREB	-7.44804	2.6922	-1.88588	/
RchiOBHm_Chr3g0461691	DREB2A	dehydration-responsive element-binding protein (DREB2), partial [Malus domestica]	DREB	-2.70287	1.45825	/	-1.53881
RchiOBHm_Chr2g0160621	DREB2A	DREB1 [Sophora moorcroftiana]	DREB	/	/	-1.9212	/
All data are shown log2 Ratio, and positive and negative values of Log2 Ratio are either up- or down-regulated genes in the four pair-comparisons. No significant fold changes are indicated as “/”
