# Supplementary material for: Comparative Transcriptome Analysis Reveals Molecular Mechanism and Regulatory Network of Rosa Chinensis ‘Old Blush’ Leaves in Response to Drought Stress
Source: Research Square preprint supplement (doi:10.21203/rs.3.rs-112819/v1), 2020-11-24
Supplement: Supplementary file 4 [file 984070405fb18b8f8d7d661f.xlsx]

## Sheet: Sheet1
Table S8 Starch and sucrose metabolism-related genes that were differentially expressed in response to drought treatment
Gene id	Gene name	Description	Log2 fold change(DT1/CK)	Log2 fold change(DT2/CK)	Log2 fold change(DT3/CK)	Log2 fold change(RW/CK)
RchiOBHm_Chr4g0432291	At1g67750	PREDICTED: probable pectate lyase 5 [Fragaria vesca subsp. vesca] [Fragaria vesca]	4.93011	-2.01718	-5.49399	4.03349
RchiOBHm_Chr7g0191921	At5g63180	PREDICTED: probable pectate lyase 18 [Fragaria vesca subsp. vesca] [Fragaria vesca]	5.58214	/	1.96413	3.50545
RchiOBHm_Chr1g0380731	PME34	PREDICTED: probable pectinesterase/pectinesterase inhibitor 34 [Fragaria vesca subsp. vesca] [Fragaria vesca]	3.17655	1.14004	-2.48387	2.10333
RchiOBHm_Chr2g0096461	PME44	PREDICTED: pectinesterase/pectinesterase inhibitor PPE8B-like [Fragaria vesca subsp. vesca] [Fragaria vesca]	3.71821	2.04224	/	3.44789
RchiOBHm_Chr4g0443501	PME6	PREDICTED: pectinesterase [Fragaria vesca subsp. vesca] [Fragaria vesca]	2.00946	/	-5.84394	1.4303
RchiOBHm_Chr2g0096331	PME54	PREDICTED: pectinesterase [Fragaria vesca subsp. vesca] [Fragaria vesca]	4.9419	1.60452	/	5.85142
RchiOBHm_Chr6g0294341	PME40	PREDICTED: pectinesterase-like [Fragaria vesca subsp. vesca] [Fragaria vesca]	5.39446	3.41785	/	5.04712
RchiOBHm_Chr4g0396921	At3g07010	PREDICTED: probable pectate lyase 8 [Fragaria vesca subsp. vesca] [Fragaria vesca]	2.97967	/	/	1.64177
RchiOBHm_Chr2g0092041	PME53	PREDICTED: probable pectinesterase 53 [Fragaria vesca subsp. vesca] [Fragaria vesca]	3.03562	2.36134	/	/
RchiOBHm_Chr1g0330991	PME25	PREDICTED: probable pectinesterase/pectinesterase inhibitor 25, partial [Fragaria vesca subsp. vesca] [Fragaria vesca]	2.69401	3.93054	1.94222	1.982
RchiOBHm_Chr1g0374561	PME33	PREDICTED: probable pectinesterase/pectinesterase inhibitor 60 [Fragaria vesca subsp. vesca] [Fragaria vesca]	9.30682	7.73697	/	9.60733
RchiOBHm_Chr2g0096441	PME12	PREDICTED: probable pectinesterase/pectinesterase inhibitor 12 [Fragaria vesca subsp. vesca] [Fragaria vesca]	1.02515	/	-3.49367	1.99758
RchiOBHm_Chr2g0173681	--	PREDICTED: pectate lyase-like [Fragaria vesca subsp. vesca] [Fragaria vesca]	2.75732	/	4.47545	2.32698
RchiOBHm_Chr7g0237051	PME20	PREDICTED: pectinesterase-like [Fragaria vesca subsp. vesca] [Fragaria vesca]	2.73272	3.05209	7.94079	/
RchiOBHm_Chr2g0153521	PME8	PREDICTED: probable pectinesterase 8 [Fragaria vesca subsp. vesca] [Fragaria vesca]	7.73697	/	/	8.87652
RchiOBHm_Chr3g0470631	At3g53190	PREDICTED: probable pectate lyase 12 [Fragaria vesca subsp. vesca] [Fragaria vesca]	2.31389	/	/	/
RchiOBHm_Chr6g0285301	At5g48900	pectate lyase [Rosa x borboniana]	2.29123	/	3.61005	/
RchiOBHm_Chr7g0188781	At5g13980	PREDICTED: alpha-mannosidase-like isoform X2 [Fragaria vesca subsp. vesca] [Fragaria vesca]	2.20409	2.12847	-7.40939	/
RchiOBHm_Chr7g0218121	MLO13	PREDICTED: endoglucanase 25 [Fragaria vesca subsp. vesca] [Fragaria vesca]	1.28315	1.04831	/	/
RchiOBHm_Chr5g0049481	BACOVA_02659	PREDICTED: lysosomal beta glucosidase-like [Fragaria vesca subsp. vesca] [Fragaria vesca]	3.92037	/	-5.47721	3.64456
RchiOBHm_Chr6g0249341	At4g10260	PREDICTED: probable fructokinase-5 [Fragaria vesca subsp. vesca] [Fragaria vesca]	5.18432	4.31187	1.16099	6.60218
RchiOBHm_Chr1g0374511	INV*DC4	PREDICTED: beta-fructofuranosidase, soluble isoenzyme I-like [Fragaria vesca subsp. vesca] [Fragaria vesca]	2.89437	/	6.72078	3.10387
RchiOBHm_Chr2g0165911	AMY3	Alpha-amylase isozyme 2A [Morus notabilis]	2.10388	/	/	2.80566
RchiOBHm_Chr2g0095901	SS	PREDICTED: sucrose synthase [Fragaria vesca subsp. vesca] [Fragaria vesca]	1.78483	/	2.09795	2.6697
RchiOBHm_Chr5g0077951	BGLU12	PREDICTED: beta-glucosidase 12-like [Fragaria vesca subsp. vesca] [Fragaria vesca]	3.05798	/	-3.02294	2.11373
RchiOBHm_Chr7g0186361	TRE1	PREDICTED: probable trehalase [Fragaria vesca subsp. vesca] [Fragaria vesca]	1.34395	/	3.33707	1.79537
RchiOBHm_Chr7g0218131	KOR	PREDICTED: endoglucanase 25 [Fragaria vesca subsp. vesca] [Fragaria vesca]	1.63724	/	/	1.72637
RchiOBHm_Chr5g0018581	Os06g0675700	PREDICTED: alpha-glucosidase-like [Fragaria vesca subsp. vesca] [Fragaria vesca]	1.40698	/	/	/
RchiOBHm_Chr7g0178741	BGLU44	PREDICTED: beta-glucosidase 44-like [Fragaria vesca subsp. vesca] [Fragaria vesca]	2.65803	/	/	2.17616
RchiOBHm_Chr5g0071491	BGLU12	beta-glucosidase [Rosa hybrid cultivar]	3.58277	/	7.83243	3.22146
RchiOBHm_Chr7g0187571	WAXY	PREDICTED: granule-bound starch synthase 1, chloroplastic/amyloplastic [Fragaria vesca subsp. vesca] [Fragaria vesca]	-2.98327	/	/	-1.94907
RchiOBHm_Chr6g0267611	At4g39010	PREDICTED: endoglucanase 24-like [Fragaria vesca subsp. vesca] [Fragaria vesca]	1.78768	/	-5.05063	2.78045
RchiOBHm_Chr4g0414151	SPS3	PREDICTED: probable sucrose-phosphate synthase 3 [Fragaria vesca subsp. vesca] [Fragaria vesca]	1.33636	/	3.26773	1.7498
RchiOBHm_Chr2g0140711	HXK1	PREDICTED: hexokinase-1-like [Fragaria vesca subsp. vesca] [Fragaria vesca]	3.81378	2.91886	/	4.8392
RchiOBHm_Chr5g0009141	glpV	PREDICTED: glycogen phosphorylase 1-like [Fragaria vesca subsp. vesca] [Fragaria vesca]	1.50147	/	/	2.21546
RchiOBHm_Chr5g0077981	BGLU12	PREDICTED: beta-glucosidase 12-like isoform X2 [Fragaria vesca subsp. vesca] [Fragaria vesca]	3.55254	/	3.03562	3.45066
RchiOBHm_Chr6g0291581	ISA2	PREDICTED: isoamylase 2, chloroplastic [Fragaria vesca subsp. vesca] [Fragaria vesca]	1.01916	/	/	/
RchiOBHm_Chr5g0077961	BGLU12	beta-glucosidase [Rosa hybrid cultivar]	2.41348	/	10.7457	/
RchiOBHm_Chr5g0012561	TPS1	PREDICTED: alpha,alpha-trehalose-phosphate synthase [UDP-forming] 1-like [Fragaria vesca subsp. vesca] [Fragaria vesca]	-2.42459	/	-2.2953	2.58636
RchiOBHm_Chr4g0443471	CEL1	PREDICTED: endoglucanase 8 [Fragaria vesca subsp. vesca] [Fragaria vesca]	1.76451	/	/	/
RchiOBHm_Chr5g0078011	BGLU12	PREDICTED: beta-glucosidase 13-like [Fragaria vesca subsp. vesca] [Fragaria vesca]	-2.1197	/	/	-1.48621
RchiOBHm_Chr7g0202311	INVA	PREDICTED: acid beta-fructofuranosidase-like [Fragaria vesca subsp. vesca] [Fragaria vesca]	2.08342	/	8.60927	/
RchiOBHm_Chr5g0018611	--	PREDICTED: alpha-glucosidase-like [Fragaria vesca subsp. vesca] [Fragaria vesca]	1.07339	/	/	1.07299
RchiOBHm_Chr3g0494731	DPE2	PREDICTED: 4-alpha-glucanotransferase DPE2 [Fragaria vesca subsp. vesca] [Fragaria vesca]	-1.19507	/	-1.49209	1.9127
RchiOBHm_Chr7g0234981	BGLU11	PREDICTED: beta-glucosidase 11-like isoform X3 [Pyrus x bretschneideri]	-1.99154	/	-4.70895	-1.37047
RchiOBHm_Chr3g0490581	At1g66250	PREDICTED: glucan endo-1,3-beta-glucosidase 2 [Fragaria vesca subsp. vesca] [Fragaria vesca]	1.46481	/	-2.8679	1.71406
RchiOBHm_Chr5g0040911	SBE3	PREDICTED: 1,4-alpha-glucan-branching enzyme 3, chloroplastic/amyloplastic isoform X1 [Fragaria vesca subsp. vesca] [Fragaria vesca]	-1.68756	/	-2.59626	/
RchiOBHm_Chr5g0036981	BGLU25	Beta glucosidase 41 isoform 1 [Theobroma cacao]	-3.2738	/	/	/
RchiOBHm_Chr7g0238421	ISA3	PREDICTED: isoamylase 3, chloroplastic [Fragaria vesca subsp. vesca] [Fragaria vesca]	-1.35875	/	-2.83924	/
RchiOBHm_Chr5g0040901	SBE3	PREDICTED: 1,4-alpha-glucan-branching enzyme 3, chloroplastic/amyloplastic isoform X1 [Fragaria vesca subsp. vesca] [Fragaria vesca]	-1.82123	/	-3.04363	/
RchiOBHm_Chr7g0193901	TPS9	PREDICTED: probable alpha,alpha-trehalose-phosphate synthase [UDP-forming] 9 [Fragaria vesca subsp. vesca] [Fragaria vesca]	-1.30191	/	3.53451	1.13264
RchiOBHm_Chr1g0380201	TPPD	PREDICTED: probable trehalose-phosphate phosphatase 4 [Pyrus x bretschneideri]	1.50901	/	6.64119	2.56635
RchiOBHm_Chr1g0368231	SPS1	PREDICTED: probable sucrose-phosphate synthase 1 [Fragaria vesca subsp. vesca] [Fragaria vesca]	-2.26534	/	/	/
RchiOBHm_Chr2g0169091	At5g15110	PREDICTED: pectate lyase-like [Fragaria vesca subsp. vesca] [Fragaria vesca]	/	7.64386	/	/
RchiOBHm_Chr3g0456351	PME32	pectinesterase family protein [Populus trichocarpa]	/	2.69661	1.84246	3.1973
RchiOBHm_Chr6g0294321	PME7	PREDICTED: probable pectinesterase/pectinesterase inhibitor 7 [Fragaria vesca subsp. vesca] [Fragaria vesca]	/	2.8088	1.51609	/
RchiOBHm_Chr1g0353671	PMM	PREDICTED: phosphomannomutase isoform X2 [Fragaria vesca subsp. vesca] [Fragaria vesca]	/	-1.63898	/	/
RchiOBHm_Chr1g0366401	UXS5	PREDICTED: UDP-glucuronic acid decarboxylase 5-like [Fragaria vesca subsp. vesca] [Fragaria vesca]	/	1.33617	4.54762	/
RchiOBHm_Chr2g0086161	ChiC	PREDICTED: chitotriosidase-1-like [Fragaria vesca subsp. vesca] [Fragaria vesca]	/	-2.90779	1.43821	/
RchiOBHm_Chr2g0151131	RHM1	PREDICTED: trifunctional UDP-glucose 4,6-dehydratase/UDP-4-keto-6-deoxy-D-glucose 3,5-epimerase/UDP-4-keto-L-rhamnose-reductase RHM1-like [Fragaria vesca subsp. vesca] [Fragaria vesca]	/	1.34516	/	/
RchiOBHm_Chr2g0153861	MUR4	PREDICTED: UDP-arabinose 4-epimerase 1-like [Fragaria vesca subsp. vesca] [Fragaria vesca]	/	2.1302	2.95936	/
RchiOBHm_Chr2g0155241	AGPP	ADP-glucose pyrophosphorylase small subunit [Fragaria x ananassa]	/	-1.27402	-4.40841	/
RchiOBHm_Chr2g0165161	UPTG2	PREDICTED: alpha-1,4-glucan-protein synthase [UDP-forming] 2 [Fragaria vesca subsp. vesca] [Fragaria vesca]	/	2.926	4.7211	/
RchiOBHm_Chr2g0173281	GLCAK1	PREDICTED: glucuronokinase 1 [Fragaria vesca subsp. vesca] [Fragaria vesca]	/	1.38712	4.28343	/
RchiOBHm_Chr3g0447661	GFPT2	PREDICTED: glutamine--fructose-6-phosphate aminotransferase [isomerizing] 2 [Fragaria vesca subsp. vesca] [Fragaria vesca]	/	1.77183	1.09557	/
RchiOBHm_Chr4g0388911	GME-1	PREDICTED: GDP-mannose 3,5-epimerase 1 [Ziziphus jujuba]	/	4.58108	6.16474	/
RchiOBHm_Chr4g0398191	GALAK	PREDICTED: galacturonokinase [Fragaria vesca subsp. vesca] [Fragaria vesca]	/	1.38887	1.61787	/
RchiOBHm_Chr4g0399291	PMI1	PREDICTED: mannose-6-phosphate isomerase 2-like [Fragaria vesca subsp. vesca] [Fragaria vesca]	/	3.36632	/	/
RchiOBHm_Chr4g0413621	GAE6	PREDICTED: UDP-glucuronate 4-epimerase 6 [Fragaria vesca subsp. vesca] [Fragaria vesca]	/	1.04688	-3.90965	/
RchiOBHm_Chr4g0417331	ADG2	PREDICTED: glucose-1-phosphate adenylyltransferase large subunit 3, chloroplastic/amyloplastic [Fragaria vesca subsp. vesca] [Fragaria vesca]	/	-1.8516	-5.01457	/
RchiOBHm_Chr5g0000151	GAUT4	PREDICTED: probable galacturonosyltransferase 4 isoform X1 [Fragaria vesca subsp. vesca] [Fragaria vesca]	/	1.83661	/	/
RchiOBHm_Chr5g0020631	GLCNAC1PUT1	PREDICTED: UDP-N-acetylglucosamine diphosphorylase 1 [Fragaria vesca subsp. vesca] [Fragaria vesca]	/	1.00171	1.00237	/
RchiOBHm_Chr5g0045001	PMM	phosphomannomutase, partial [Rosa roxburghii]	/	-1.41187	-1.6953	/
RchiOBHm_Chr6g0253671	BXL5	PREDICTED: probable beta-D-xylosidase 5 [Fragaria vesca subsp. vesca] [Fragaria vesca]	/	2.29053	-2.74277	/
RchiOBHm_Chr6g0253681	--	PREDICTED: probable beta-D-xylosidase 5 isoform X2 [Prunus mume]	/	-1.00583	1.90438	/
RchiOBHm_Chr6g0253691	BXL5	PREDICTED: probable beta-D-xylosidase 5 [Fragaria vesca subsp. vesca] [Fragaria vesca]	/	1.87036	/	/
RchiOBHm_Chr7g0194541	UGE5	PREDICTED: UDP-glucose 4-epimerase GEPI48-like [Fragaria vesca subsp. vesca] [Fragaria vesca]	/	4.32441	4.73634	/
RchiOBHm_Chr7g0194661	UGE2	PREDICTED: UDP-glucose 4-epimerase GEPI48-like [Fragaria vesca subsp. vesca] [Fragaria vesca]	/	1.56617	1.89837	/
RchiOBHm_Chr7g0199641	NRS/ER	PREDICTED: bifunctional dTDP-4-dehydrorhamnose 3,5-epimerase/dTDP-4-dehydrorhamnose reductase [Fragaria vesca subsp. vesca] [Fragaria vesca]	/	-1.12478	-3.90939	/
RchiOBHm_Chr7g0208231	PMI1	PREDICTED: mannose-6-phosphate isomerase 2-like [Fragaria vesca subsp. vesca] [Fragaria vesca]	/	-1.27858	/	/
RchiOBHm_Chr2g0091971	HXK1	PREDICTED: hexokinase-1 [Fragaria vesca subsp. vesca] [Fragaria vesca]	/	/	1.43595	/
RchiOBHm_Chr4g0404641	TPS11	PREDICTED: probable alpha,alpha-trehalose-phosphate synthase [UDP-forming] 11 [Fragaria vesca subsp. vesca] [Fragaria vesca]	/	/	6.14208	/
RchiOBHm_Chr1g0313271	CIT	PREDICTED: citrate synthase, mitochondrial [Fragaria vesca subsp. vesca] [Fragaria vesca]	/	/	1.41919	/
RchiOBHm_Chr7g0202841	Ldha	PREDICTED: L-lactate dehydrogenase A [Fragaria vesca subsp. vesca] [Fragaria vesca]	/	/	-2.31321	/
RchiOBHm_Chr4g0385481	GAL1	PREDICTED: galactokinase [Fragaria vesca subsp. vesca] [Fragaria vesca]	/	/	-1.90237	/
RchiOBHm_Chr3g0450111	At3g07010	PREDICTED: probable pectate lyase 8 [Fragaria vesca subsp. vesca] [Fragaria vesca]	/	/	3.56071	/
RchiOBHm_Chr6g0294361	SUS2	PREDICTED: sucrose synthase 2 [Fragaria vesca subsp. vesca] [Fragaria vesca]	/	/	1.63352	/
RchiOBHm_Chr4g0384801	SS4	PREDICTED: probable starch synthase 4, chloroplastic/amyloplastic [Fragaria vesca subsp. vesca] [Fragaria vesca]	/	/	-3.2401	-1.12267
RchiOBHm_Chr4g0406591	At3g59480	PREDICTED: probable fructokinase-4 [Fragaria vesca subsp. vesca] [Fragaria vesca]	/	/	1.9109	/
RchiOBHm_Chr1g0376211	At5g51830	PREDICTED: probable fructokinase-7 isoform X1 [Fragaria vesca subsp. vesca] [Fragaria vesca]	/	/	1.6091	/
RchiOBHm_Chr4g0444141	TPS10	PREDICTED: probable alpha,alpha-trehalose-phosphate synthase [UDP-forming] 10 [Fragaria vesca subsp. vesca] [Fragaria vesca]	/	/	2.69467	1.97547
RchiOBHm_Chr2g0143501	CWINV1	PREDICTED: beta-fructofuranosidase, insoluble isoenzyme CWINV1-like [Fragaria vesca subsp. vesca] [Fragaria vesca]	/	/	3.35483	/
RchiOBHm_Chr6g0303841	AMY2	PREDICTED: probable alpha-amylase 2 [Fragaria vesca subsp. vesca] [Fragaria vesca]	/	/	2.11953	/
RchiOBHm_Chr7g0237321	PGI1	PREDICTED: glucose-6-phosphate isomerase 1, chloroplastic [Fragaria vesca subsp. vesca] [Fragaria vesca]	/	/	1.57939	/
RchiOBHm_Chr5g0068321	PHS2	PREDICTED: alpha-glucan phosphorylase, H isozyme [Fragaria vesca subsp. vesca] [Fragaria vesca]	/	/	-3.78331	/
RchiOBHm_Chr4g0438671	STP-1	PREDICTED: alpha-1,4 glucan phosphorylase L-2 isozyme, chloroplastic/amyloplastic-like [Fragaria vesca subsp. vesca] [Fragaria vesca]	/	/	-5.47436	/
RchiOBHm_Chr6g0297571	SPS1	PREDICTED: probable sucrose-phosphate synthase 1 [Fragaria vesca subsp. vesca] [Fragaria vesca]	/	/	5.16469	/
RchiOBHm_Chr1g0331601	BACOVA_02659	PREDICTED: lysosomal beta glucosidase-like [Fragaria vesca subsp. vesca] [Fragaria vesca]	/	/	1.38283	/
RchiOBHm_Chr7g0196541	At4g23560	PREDICTED: endoglucanase 20-like [Fragaria vesca subsp. vesca] [Fragaria vesca]	/	/	14.4553	/
RchiOBHm_Chr1g0361061	WAXY	PREDICTED: granule-bound starch synthase 1, chloroplastic/amyloplastic-like [Fragaria vesca subsp. vesca] [Fragaria vesca]	/	/	-5.35799	-1.34012
RchiOBHm_Chr3g0488651	SUS7	PREDICTED: sucrose synthase 7 [Fragaria vesca subsp. vesca] [Fragaria vesca]	/	/	4.03046	/
RchiOBHm_Chr1g0376171	PGMP	PREDICTED: phosphoglucomutase, chloroplastic [Fragaria vesca subsp. vesca] [Fragaria vesca]	/	/	-1.99373	/
RchiOBHm_Chr2g0174751	BGLU13	PREDICTED: beta-glucosidase 13-like [Fragaria vesca subsp. vesca] [Fragaria vesca]	/	/	4.62364	/
RchiOBHm_Chr4g0398221	ISA1	PREDICTED: isoamylase 1, chloroplastic [Fragaria vesca subsp. vesca] [Fragaria vesca]	/	/	-4.93579	/
RchiOBHm_Chr2g0116371	DPEP	PREDICTED: 4-alpha-glucanotransferase, chloroplastic/amyloplastic [Fragaria vesca subsp. vesca] [Fragaria vesca]	/	/	-2.23536	/
RchiOBHm_Chr4g0403961	NUDT14	PREDICTED: nudix hydrolase 14, chloroplastic [Fragaria vesca subsp. vesca] [Fragaria vesca]	/	/	-2.4352	/
RchiOBHm_Chr1g0380511	SS1	PREDICTED: starch synthase 1, chloroplastic/amyloplastic [Fragaria vesca subsp. vesca] [Fragaria vesca]	/	/	-2.12072	-1.45558
RchiOBHm_Chr6g0257321	AMY1.3	PREDICTED: alpha-amylase-like [Pyrus x bretschneideri]	/	/	3.49211	/
RchiOBHm_Chr5g0029381	TPS1	PREDICTED: alpha,alpha-trehalose-phosphate synthase [UDP-forming] 1 [Fragaria vesca subsp. vesca] [Fragaria vesca]	/	/	-2.57043	/
RchiOBHm_Chr4g0438611	BGLU40	beta-glucosidase 1 [Fragaria x ananassa]	/	/	1.82782	/
RchiOBHm_Chr6g0265101	NUDT14	PREDICTED: nudix hydrolase 14, chloroplastic [Prunus mume]	/	/	-3.34269	/
RchiOBHm_Chr7g0239531	TPPD	PREDICTED: probable trehalose-phosphate phosphatase D [Fragaria vesca subsp. vesca] [Fragaria vesca]	/	/	-5.98299	-1.36461
RchiOBHm_Chr7g0177421	SUS6	PREDICTED: sucrose synthase 7-like isoform X1 [Fragaria vesca subsp. vesca] [Fragaria vesca]	/	/	2.54432	2.22239
RchiOBHm_Chr5g0013241	SS4	PREDICTED: probable starch synthase 4, chloroplastic/amyloplastic isoform X1 [Fragaria vesca subsp. vesca] [Fragaria vesca]	/	/	-2.26912	/
RchiOBHm_Chr7g0194531	At1g06030	PREDICTED: probable fructokinase-4 [Fragaria vesca subsp. vesca] [Fragaria vesca]	/	/	3.60602	/
RchiOBHm_Chr6g0249631	SPS4	PREDICTED: probable sucrose-phosphate synthase 4 [Fragaria vesca subsp. vesca] [Fragaria vesca]	/	/	-2.51746	/
RchiOBHm_Chr2g0166331	PHO1	PREDICTED: alpha-1,4 glucan phosphorylase L isozyme, chloroplastic/amyloplastic-like [Fragaria vesca subsp. vesca] [Fragaria vesca]	/	/	-4.13599	/
RchiOBHm_Chr5g0077911	BGLU12	PREDICTED: beta-glucosidase 12-like [Fragaria vesca subsp. vesca] [Fragaria vesca]	/	/	4.32193	/
RchiOBHm_Chr3g0472421	SBEI	PREDICTED: 1,4-alpha-glucan-branching enzyme 1, chloroplastic/amyloplastic [Fragaria vesca subsp. vesca] [Fragaria vesca]	/	/	-2.24938	/
RchiOBHm_Chr5g0002751	At1g11820	PREDICTED: glucan endo-1,3-beta-glucosidase 1 isoform X1 [Fragaria vesca subsp. vesca] [Fragaria vesca]	/	/	-2.04367	1.01158
RchiOBHm_Chr2g0093161	SS	PREDICTED: sucrose synthase-like [Fragaria vesca subsp. vesca] [Fragaria vesca]	/	/	3.57154	/
MSTRG.30847	SPS2	PREDICTED: probable sucrose-phosphate synthase 3 [Fragaria vesca subsp. vesca] [Fragaria vesca]	/	/	5.47249	/
RchiOBHm_Chr6g0265181	NUDT14	PREDICTED: nudix hydrolase 14, chloroplastic [Prunus mume]	/	/	-10.2644	/
RchiOBHm_Chr5g0083121	At3g13560	PREDICTED: glucan endo-1,3-beta-glucosidase 4 [Fragaria vesca subsp. vesca] [Fragaria vesca]	/	/	-2.96111	/
RchiOBHm_Chr6g0300881	PGIC	PREDICTED: glucose-6-phosphate isomerase, cytosolic [Fragaria vesca subsp. vesca] [Fragaria vesca]	/	/	-1.41088	-1.13901
RchiOBHm_Chr7g0210321	TPS5	PREDICTED: alpha,alpha-trehalose-phosphate synthase [UDP-forming] 5 [Fragaria vesca subsp. vesca] [Fragaria vesca]	/	/	-2.3707	/
RchiOBHm_Chr6g0272701	PGI1	PREDICTED: glucose-6-phosphate isomerase 1, chloroplastic [Vigna angularis]	/	/	-1.79826	/
RchiOBHm_Chr4g0401671	SPS1	PREDICTED: probable sucrose-phosphate synthase 1 [Fragaria vesca subsp. vesca] [Fragaria vesca]	/	/	3.06774	/
RchiOBHm_Chr2g0168331	SS2	PREDICTED: granule-bound starch synthase 2, chloroplastic/amyloplastic [Fragaria vesca subsp. vesca] [Fragaria vesca]	/	/	-1.74687	/
RchiOBHm_Chr6g0261321	Os10g0521000	PREDICTED: probable trehalase [Fragaria vesca subsp. vesca] [Fragaria vesca]	/	/	-1.88543	/
RchiOBHm_Chr7g0178751	BGLU44	PREDICTED: beta-glucosidase 44-like [Fragaria vesca subsp. vesca] [Fragaria vesca]	/	/	-3.23522	/
RchiOBHm_Chr2g0143521	CWINV1	PREDICTED: beta-fructofuranosidase, insoluble isoenzyme CWINV1-like isoform X1 [Fragaria vesca subsp. vesca] [Fragaria vesca]	/	/	-4.35755	/
RchiOBHm_Chr5g0052031	PGI1	PREDICTED: glucose-6-phosphate isomerase 1, chloroplastic [Ipomoea nil]	/	/	1.51	/
RchiOBHm_Chr6g0257251	AMY1.1	PREDICTED: LOW QUALITY PROTEIN: alpha-amylase-like [Fragaria vesca subsp. vesca] [Fragaria vesca]	/	/	-1.3658	-1.12659
RchiOBHm_Chr7g0200241	NUDT14	PREDICTED: nudix hydrolase 14, chloroplastic [Fragaria vesca subsp. vesca] [Fragaria vesca]	/	/	-1.33107	/
RchiOBHm_Chr3g0496721	BACOVA_02659	PREDICTED: beta-glucosidase BoGH3B-like isoform X2 [Prunus mume]	/	/	-1.75249	/
RchiOBHm_Chr6g0304311	SBEII	PREDICTED: 1,4-alpha-glucan-branching enzyme 1, chloroplastic/amyloplastic-like [Fragaria vesca subsp. vesca] [Fragaria vesca]	/	/	-1.94448	/
RchiOBHm_Chr1g0374491	TPPA	PREDICTED: trehalose-phosphate phosphatase A [Fragaria vesca subsp. vesca] [Fragaria vesca]	/	/	-1.67921	/
RchiOBHm_Chr5g0068591	BACOVA_02659	PREDICTED: lysosomal beta glucosidase-like [Fragaria vesca subsp. vesca] [Fragaria vesca]	/	/	-1.64894	/
RchiOBHm_Chr2g0115021	TPPJ	PREDICTED: probable trehalose-phosphate phosphatase J [Fragaria vesca subsp. vesca] [Fragaria vesca]	/	/	-1.54065	/
RchiOBHm_Chr2g0173061	RFS5	PREDICTED: probable galactinol--sucrose galactosyltransferase 5 [Fragaria vesca subsp. vesca] [Fragaria vesca]	/	/	6.64143	/
RchiOBHm_Chr3g0487291	STS1	PREDICTED: stachyose synthase [Fragaria vesca subsp. vesca] [Fragaria vesca]	/	/	6.01158	/
RchiOBHm_Chr4g0443671	GOLS1	PREDICTED: galactinol synthase 1 [Fragaria vesca subsp. vesca] [Fragaria vesca]	/	/	-8.66275	/
RchiOBHm_Chr1g0373651	PFK4	PREDICTED: ATP-dependent 6-phosphofructokinase 4, chloroplastic [Fragaria vesca subsp. vesca] [Fragaria vesca]	/	/	4.06263	/
RchiOBHm_Chr2g0087631	RFS6	PREDICTED: probable galactinol--sucrose galactosyltransferase 6 [Fragaria vesca subsp. vesca] [Fragaria vesca]	/	/	7.22971	/
RchiOBHm_Chr3g0481621	RFS2	PREDICTED: probable galactinol--sucrose galactosyltransferase 2 [Fragaria vesca subsp. vesca] [Fragaria vesca]	/	/	4.17942	/
RchiOBHm_Chr7g0198901	UGE3	PREDICTED: bifunctional UDP-glucose 4-epimerase and UDP-xylose 4-epimerase 1 [Fragaria vesca subsp. vesca] [Fragaria vesca]	/	/	2.71251	/
RchiOBHm_Chr1g0372021	AGAL3	PREDICTED: alpha-galactosidase 3 [Fragaria vesca subsp. vesca] [Fragaria vesca]	/	/	2.94364	/
RchiOBHm_Chr4g0426261	GOLS2	PREDICTED: galactinol synthase 2-like [Fragaria vesca subsp. vesca] [Fragaria vesca]	/	/	5.10028	/
RchiOBHm_Chr5g0075141	RFS1	PREDICTED: probable galactinol--sucrose galactosyltransferase 1 [Fragaria vesca subsp. vesca] [Fragaria vesca]	/	/	3.13641	/
RchiOBHm_Chr7g0180821	GALM	PREDICTED: aldose 1-epimerase [Fragaria vesca subsp. vesca] [Fragaria vesca]	/	/	6.00882	/
RchiOBHm_Chr7g0178251	GALM	PREDICTED: aldose 1-epimerase [Fragaria vesca subsp. vesca] [Fragaria vesca]	/	/	2.48166	/
RchiOBHm_Chr3g0457621	GOLS2	PREDICTED: galactinol synthase 2-like [Fragaria vesca subsp. vesca] [Fragaria vesca]	/	/	4.78686	/
RchiOBHm_Chr6g0296821	USP	PREDICTED: UDP-sugar pyrophosphorylase [Fragaria vesca subsp. vesca] [Fragaria vesca]	/	/	1.33628	/
RchiOBHm_Chr5g0000241	PFK2	PREDICTED: ATP-dependent 6-phosphofructokinase 2 [Fragaria vesca subsp. vesca] [Fragaria vesca]	/	/	2.39394	/
RchiOBHm_Chr2g0168911	GALM	PREDICTED: aldose 1-epimerase-like [Fragaria vesca subsp. vesca] [Fragaria vesca]	/	/	2.49611	/
RchiOBHm_Chr3g0457631	GOLS2	PREDICTED: galactinol synthase 2-like [Fragaria vesca subsp. vesca] [Fragaria vesca]	/	/	3.57814	/
RchiOBHm_Chr2g0091201	STS1	PREDICTED: stachyose synthase-like [Fragaria vesca subsp. vesca] [Fragaria vesca]	/	/	2.85798	/
RchiOBHm_Chr2g0092311	PFK3	PREDICTED: ATP-dependent 6-phosphofructokinase 3-like [Fragaria vesca subsp. vesca] [Fragaria vesca]	/	/	1.08868	/
RchiOBHm_Chr6g0272391	AGAL1	PREDICTED: alpha-galactosidase 1-like isoform X2 [Fragaria vesca subsp. vesca] [Fragaria vesca]	/	/	-4.48601	/
RchiOBHm_Chr7g0192961	RFS	PREDICTED: galactinol--sucrose galactosyltransferase-like [Fragaria vesca subsp. vesca] [Fragaria vesca]	/	/	-3.78575	/
RchiOBHm_Chr2g0143451	BGAL17	PREDICTED: beta-galactosidase 17 [Fragaria vesca subsp. vesca] [Fragaria vesca]	/	/	-1.73454	/
RchiOBHm_Chr3g0487311	STS1	PREDICTED: stachyose synthase [Fragaria vesca subsp. vesca] [Fragaria vesca]	/	/	8.36632	/
RchiOBHm_Chr1g0324261	lacZ	PREDICTED: beta-galactosidase [Fragaria vesca subsp. vesca] [Fragaria vesca]	/	/	-1.70792	/
RchiOBHm_Chr4g0447241	AGAL1	PREDICTED: alpha-galactosidase 1 [Fragaria vesca subsp. vesca] [Fragaria vesca]	/	/	-1.34491	/
RchiOBHm_Chr4g0397131	AGAL2	PREDICTED: alpha-galactosidase [Fragaria vesca subsp. vesca] [Fragaria vesca]	/	/	-7.96578	/
RchiOBHm_Chr3g0464191	FBP	PREDICTED: fructose-1,6-bisphosphatase, chloroplastic [Fragaria vesca subsp. vesca] [Fragaria vesca]	/	/	-5.60806	/
RchiOBHm_Chr4g0403601	XYLA	PREDICTED: xylose isomerase [Fragaria vesca subsp. vesca] [Fragaria vesca]	/	/	2.64178	/
RchiOBHm_Chr3g0472251	FBA1	PREDICTED: fructose-bisphosphate aldolase cytoplasmic isozyme [Fragaria vesca subsp. vesca] [Fragaria vesca]	/	/	1.7217	/
RchiOBHm_Chr6g0275641	FBPban1	PREDICTED: fructose-1,6-bisphosphatase, cytosolic [Fragaria vesca subsp. vesca] [Fragaria vesca]	/	/	-4.25225	/
RchiOBHm_Chr3g0472261	FBA1	cytosolic aldolase [Fragaria x ananassa]	/	/	1.77906	/
RchiOBHm_Chr5g0075371	FBA5	PREDICTED: fructose-bisphosphate aldolase, cytoplasmic isozyme 1 [Malus domestica]	/	/	-3.19462	/
RchiOBHm_Chr4g0434081	FBA3	PREDICTED: probable fructose-bisphosphate aldolase 3, chloroplastic [Fragaria vesca subsp. vesca] [Fragaria vesca]	/	/	1.23623	/
RchiOBHm_Chr6g0245261	TPI	triosephosphate isomerase [Fragaria x ananassa]	/	/	-2.53528	/
RchiOBHm_Chr6g0267861	FBA2	PREDICTED: fructose-bisphosphate aldolase 1, chloroplastic [Fragaria vesca subsp. vesca] [Fragaria vesca]	/	/	-4.63744	/
RchiOBHm_Chr5g0046871	XYLA	xylose isomerase-like [Asparagus officinalis]	/	/	-2.40992	/
RchiOBHm_Chr7g0179791	gmppA	PREDICTED: mannose-1-phosphate guanyltransferase alpha isoform X2 [Fragaria vesca subsp. vesca] [Fragaria vesca]	/	/	-2.48018	/
RchiOBHm_Chr7g0225311	FBPban1	PREDICTED: fructose-1,6-bisphosphatase, cytosolic [Theobroma cacao]	/	/	-3.93529	/
RchiOBHm_Chr1g0337721	PFP-BETA	PREDICTED: pyrophosphate--fructose 6-phosphate 1-phosphotransferase subunit beta-like [Fragaria vesca subsp. vesca] [Fragaria vesca]	/	/	-2.82454	/
RchiOBHm_Chr5g0070401	FKFBP	PREDICTED: 6-phosphofructo-2-kinase/fructose-2,6-bisphosphatase [Fragaria vesca subsp. vesca] [Fragaria vesca]	/	/	-1.83077	/
RchiOBHm_Chr5g0064961	TPIP1	PREDICTED: triosephosphate isomerase, cytosolic [Prunus mume]	/	/	-2.18366	/
RchiOBHm_Chr1g0360431	FKGP	PREDICTED: bifunctional fucokinase/fucose pyrophosphorylase [Fragaria vesca subsp. vesca] [Fragaria vesca]	/	/	-1.40983	/
RchiOBHm_Chr2g0148271	MAN4	PREDICTED: mannan endo-1,4-beta-mannosidase 4-like [Fragaria vesca subsp. vesca] [Fragaria vesca]	/	/	-3.22005	/
RchiOBHm_Chr5g0036521	XYLA	PREDICTED: xylose isomerase [Fragaria vesca subsp. vesca] [Fragaria vesca]	/	/	-1.56524	/
RchiOBHm_Chr4g0419181	PFP-BETA	PREDICTED: pyrophosphate--fructose 6-phosphate 1-phosphotransferase subunit beta-like [Fragaria vesca subsp. vesca] [Fragaria vesca]	/	/	-1.67865	/
RchiOBHm_Chr2g0170091	gmppA	PREDICTED: mannose-1-phosphate guanyltransferase alpha [Fragaria vesca subsp. vesca] [Fragaria vesca]	/	/	-1.32251	/
RchiOBHm_Chr4g0424391	AAE7	PREDICTED: acetate/butyrate--CoA ligase AAE7, peroxisomal [Fragaria vesca subsp. vesca] [Fragaria vesca]	/	/	2.3166	/
RchiOBHm_Chr5g0024541	At1g56190	PREDICTED: phosphoglycerate kinase, chloroplastic-like [Malus domestica]	/	/	-4.94727	/
RchiOBHm_Chr3g0462531	PDC2	pyruvate decarboxylase [Rosa hybrid cultivar]	/	/	3.12553	/
RchiOBHm_Chr3g0465141	AKR4C9	PREDICTED: aldo-keto reductase family 4 member C9-like isoform X1 [Fragaria vesca subsp. vesca] [Fragaria vesca]	/	/	4.35238	/
RchiOBHm_Chr2g0095351	ALDH7B4	PREDICTED: aldehyde dehydrogenase family 7 member A1 [Fragaria vesca subsp. vesca] [Fragaria vesca]	/	/	3.11872	/
RchiOBHm_Chr7g0187501	At1g32780	PREDICTED: alcohol dehydrogenase-like 4 [Fragaria vesca subsp. vesca] [Fragaria vesca]	/	/	3.5382	/
RchiOBHm_Chr3g0459381	PGM1	PREDICTED: 2,3-bisphosphoglycerate-independent phosphoglycerate mutase [Fragaria vesca subsp. vesca] [Fragaria vesca]	/	/	1.01618	/
RchiOBHm_Chr1g0358641	--	Galactose mutarotase-like superfamily protein [Theobroma cacao]	/	/	-5.35509	/
RchiOBHm_Chr3g0471721	OsI_35105	PREDICTED: pyruvate kinase, cytosolic isozyme-like [Fragaria vesca subsp. vesca] [Fragaria vesca]	/	/	1.01167	/
RchiOBHm_Chr6g0303991	At5g42250	PREDICTED: alcohol dehydrogenase-like 7 [Fragaria vesca subsp. vesca] [Fragaria vesca]	/	/	-4.48229	/
RchiOBHm_Chr5g0024101	GAPCP1	PREDICTED: glyceraldehyde-3-phosphate dehydrogenase GAPCP1, chloroplastic [Fragaria vesca subsp. vesca] [Fragaria vesca]	/	/	3.13048	/
RchiOBHm_Chr4g0444001	ALDH2B7	PREDICTED: aldehyde dehydrogenase family 2 member B7, mitochondrial-like [Fragaria vesca subsp. vesca] [Fragaria vesca]	/	/	1.05336	/
RchiOBHm_Chr6g0277261	ADH	alcohol dehydrogenase [Rosa rugosa]	/	/	-2.44585	/
RchiOBHm_Chr6g0296181	ALDH	PREDICTED: aldehyde dehydrogenase family 3 member H1-like isoform X1 [Fragaria vesca subsp. vesca] [Fragaria vesca]	/	/	1.71236	/
RchiOBHm_Chr2g0101191	--	Aldose_epim domain-containing protein [Cephalotus follicularis]	/	/	-3.10792	/
RchiOBHm_Chr6g0286011	ADH2	PREDICTED: alcohol dehydrogenase class-3 [Fragaria vesca subsp. vesca] [Fragaria vesca]	/	/	-2.41439	/
RchiOBHm_Chr1g0334861	OsI_35105	PREDICTED: pyruvate kinase, cytosolic isozyme-like [Fragaria vesca subsp. vesca] [Fragaria vesca]	/	/	-1.99262	/
RchiOBHm_Chr2g0109721	PCKA	PREDICTED: phosphoenolpyruvate carboxykinase [ATP]-like [Fragaria vesca subsp. vesca] [Fragaria vesca]	/	/	-2.00823	/
RchiOBHm_Chr1g0343391	--	PREDICTED: pyruvate kinase isozyme A, chloroplastic-like isoform X1 [Fragaria vesca subsp. vesca] [Fragaria vesca]	/	/	-1.79499	/
RchiOBHm_Chr1g0384561	At1g22430	PREDICTED: alcohol dehydrogenase-like 1 [Fragaria vesca subsp. vesca] [Fragaria vesca]	/	/	-1.98774	/
RchiOBHm_Chr3g0470131	pgk	PREDICTED: phosphoglycerate kinase, cytosolic-like isoform X1 [Fragaria vesca subsp. vesca] [Fragaria vesca]	/	/	-2.70344	/
RchiOBHm_Chr2g0100081	ALDH3F1	PREDICTED: aldehyde dehydrogenase family 3 member F1 [Fragaria vesca subsp. vesca] [Fragaria vesca]	/	/	-1.60646	/
RchiOBHm_Chr6g0304011	At5g42250	PREDICTED: alcohol dehydrogenase-like 7 [Fragaria vesca subsp. vesca] [Fragaria vesca]	/	/	-2.02873	/
RchiOBHm_Chr3g0465241	AKR4C9	PREDICTED: aldo-keto reductase family 4 member C9-like [Pyrus x bretschneideri]	/	/	-8.53138	/
RchiOBHm_Chr6g0271801	At1g56190	PREDICTED: phosphoglycerate kinase, cytosolic-like [Fragaria vesca subsp. vesca] [Fragaria vesca]	/	/	-2.20476	/
RchiOBHm_Chr6g0296171	ALDH3H1	PREDICTED: aldehyde dehydrogenase family 3 member H1-like isoform X1 [Fragaria vesca subsp. vesca] [Fragaria vesca]	/	/	-3.89885	/
RchiOBHm_Chr3g0465221	AKR4C11	PREDICTED: aldo-keto reductase family 4 member C9-like [Prunus mume]	/	/	-2.77955	/
RchiOBHm_Chr6g0277321	ADH	PREDICTED: alcohol dehydrogenase [Malus domestica]	/	/	-2.34702	/
RchiOBHm_Chr7g0223061	PDC4	PREDICTED: pyruvate decarboxylase 2 [Ziziphus jujuba]	/	/	-7.92679	/
RchiOBHm_Chr4g0424491	LPD2	PREDICTED: dihydrolipoyl dehydrogenase 2, chloroplastic-like isoform X2 [Fragaria vesca subsp. vesca] [Fragaria vesca]	/	/	-1.30568	/
RchiOBHm_Chr4g0447231	At4g26390	PREDICTED: pyruvate kinase, cytosolic isozyme [Fragaria vesca subsp. vesca] [Fragaria vesca]	/	/	-1.54141	/
RchiOBHm_Chr7g0208881	PKP3	PREDICTED: pyruvate kinase isozyme G, chloroplastic [Fragaria vesca subsp. vesca] [Fragaria vesca]	/	/	-1.41311	/
RchiOBHm_Chr5g0084031	At4g26390	PREDICTED: pyruvate kinase, cytosolic isozyme [Fragaria vesca subsp. vesca] [Fragaria vesca]	/	/	-1.15627	/
RchiOBHm_Chr3g0465231	AKR4C9	PREDICTED: aldo-keto reductase family 4 member C9-like isoform X2 [Fragaria vesca subsp. vesca] [Fragaria vesca]	/	/	-1.86533	/
RchiOBHm_Chr7g0232491	PGM1	PREDICTED: 2,3-bisphosphoglycerate-independent phosphoglycerate mutase [Fragaria vesca subsp. vesca] [Fragaria vesca]	/	/	-1.89063	/
RchiOBHm_Chr7g0241931	HEXO2	PREDICTED: beta-hexosaminidase 2 [Fragaria vesca subsp. vesca] [Fragaria vesca]	/	/	-2.84893	/
RchiOBHm_Chr7g0225581	Xyl2	PREDICTED: beta-xylosidase/alpha-L-arabinofuranosidase 2-like isoform X1 [Fragaria vesca subsp. vesca] [Fragaria vesca]	/	/	-4.10692	/
RchiOBHm_Chr3g0473671	GNA1	PREDICTED: glucosamine 6-phosphate N-acetyltransferase [Fragaria vesca subsp. vesca] [Fragaria vesca]	/	/	1.47424	/
RchiOBHm_Chr6g0289401	GAUT6	PREDICTED: probable galacturonosyltransferase 6 isoform X1 [Fragaria vesca subsp. vesca] [Fragaria vesca]	/	/	1.17879	/
RchiOBHm_Chr2g0164201	GAUT9	PREDICTED: probable galacturonosyltransferase 9 [Fragaria vesca subsp. vesca] [Fragaria vesca]	/	/	-2.10115	/
RchiOBHm_Chr2g0161971	GAUT10	PREDICTED: probable galacturonosyltransferase 10 [Fragaria vesca subsp. vesca] [Fragaria vesca]	/	/	-2.28229	/
RchiOBHm_Chr1g0317051	RLF	PREDICTED: cytochrome b5 domain-containing protein RLF [Fragaria vesca subsp. vesca] [Fragaria vesca]	/	/	1.91775	/
RchiOBHm_Chr6g0305421	ARA1	PREDICTED: L-arabinokinase-like [Fragaria vesca subsp. vesca] [Fragaria vesca]	/	/	3.21774	/
RchiOBHm_Chr6g0299691	ChiC	PREDICTED: chitotriosidase-1-like [Fragaria vesca subsp. vesca] [Fragaria vesca]	/	/	2.05898	/
RchiOBHm_Chr4g0405111	GAE1	PREDICTED: UDP-glucuronate 4-epimerase 1 [Fragaria vesca subsp. vesca] [Fragaria vesca]	/	/	-4.56973	/
RchiOBHm_Chr3g0459281	GAUT7	PREDICTED: probable galacturonosyltransferase 7 isoform X2 [Prunus mume]	/	/	-1.66187	/
RchiOBHm_Chr6g0253721	--	PREDICTED: probable beta-D-xylosidase 5 isoform X2 [Prunus mume]	/	/	4.13203	/
RchiOBHm_Chr4g0422861	UXS4	PREDICTED: UDP-glucuronic acid decarboxylase 2-like [Fragaria vesca subsp. vesca] [Fragaria vesca]	/	/	2.94753	/
RchiOBHm_Chr7g0208321	DRT101	PREDICTED: phosphoacetylglucosamine mutase isoform X1 [Fragaria vesca subsp. vesca] [Fragaria vesca]	/	/	-1.2506	/
RchiOBHm_Chr5g0069621	CHIT3	PREDICTED: acidic endochitinase-like [Fragaria vesca subsp. vesca] [Fragaria vesca]	/	/	1.12776	/
All data are shown log2 Ratio, and positive and negative values of Log2 Ratio are either up- or down-regulated genes in the four pair-comparisons. No significant fold changes are indicated as “/”
