# Supplementary material for: Comparative Transcriptome Analysis Reveals Molecular Mechanism and Regulatory Network of Rosa Chinensis ‘Old Blush’ Leaves in Response to Drought Stress
Source: Research Square preprint supplement (doi:10.21203/rs.3.rs-112819/v1), 2020-11-24
Supplement: Supplementary file 5 [file 9a3fa8697266820f575e8651.xlsx]

## Sheet: Sheet1
Table S9 Lipid metabolism process-related genes that were differentially expressed in response to drought treatment
Gene id	Gene name	Description	Log2 fold change(DT1/CK)	Log2 fold change(DT2/CK)	Log2 fold change(DT3/CK)	Log2 fold change(RW/CK)
RchiOBHm_Chr7g0230871	At1g33811	PREDICTED: GDSL esterase/lipase At1g33811 isoform X1 [Fragaria vesca subsp. vesca] [Fragaria vesca]	3.71437	1.79879	-3.86842	4.18687
RchiOBHm_Chr2g0173381	At5g14450	PREDICTED: GDSL esterase/lipase At5g14450-like [Fragaria vesca subsp. vesca] [Fragaria vesca]	1.95382	/	-2.15354	/
RchiOBHm_Chr5g0010281	At5g45910	PREDICTED: GDSL esterase/lipase At5g45910 [Prunus mume]	4.21453	/	/	2.94811
RchiOBHm_Chr6g0290991	PLP9	PREDICTED: probable inactive patatin-like protein 9 [Fragaria vesca subsp. vesca] [Fragaria vesca]	2.75489	/	-4.59637	1.97638
RchiOBHm_Chr4g0398131	PLA2-ALPHA	PREDICTED: phospholipase A2-alpha isoform X2 [Fragaria vesca subsp. vesca] [Fragaria vesca]	2.7766	/	/	2.03586
RchiOBHm_Chr2g0147631	GLIP5	PREDICTED: GDSL esterase/lipase 5 [Fragaria vesca subsp. vesca] [Fragaria vesca]	2.64973	1.92832	3.08573	1.67069
RchiOBHm_Chr6g0307331	PLP2	PREDICTED: patatin-like protein 2 [Fragaria vesca subsp. vesca] [Fragaria vesca]	5.08236	4.19849	/	/
RchiOBHm_Chr3g0448941	At5g33370	PREDICTED: GDSL esterase/lipase At5g18430-like [Fragaria vesca subsp. vesca] [Fragaria vesca]	6.18488	4.67243	/	7.19476
RchiOBHm_Chr6g0307381	PLP2	PREDICTED: patatin-like protein 2 [Fragaria vesca subsp. vesca] [Fragaria vesca]	-2.76611	-3.33339	/	/
RchiOBHm_Chr2g0092871	PLA2-I	PREDICTED: probable phospholipase A2 homolog 1 [Fragaria vesca subsp. vesca] [Fragaria vesca]	1.45812	/	/	1.19964
RchiOBHm_Chr1g0370111	CPRD49	PREDICTED: GDSL esterase/lipase CPRD49-like [Fragaria vesca subsp. vesca] [Fragaria vesca]	1.04652	/	/	/
RchiOBHm_Chr7g0199691	PLDBETA1	PREDICTED: phospholipase D gamma 1-like [Fragaria vesca subsp. vesca] [Fragaria vesca]	1.16251	/	/	/
RchiOBHm_Chr6g0307391	PLP2	PREDICTED: patatin-like protein 2 [Fragaria vesca subsp. vesca] [Fragaria vesca]	-5.01495	2.40009	10.2777	/
RchiOBHm_Chr4g0412941	CPRD49	PREDICTED: GDSL esterase/lipase CPRD49-like [Fragaria vesca subsp. vesca] [Fragaria vesca]	-1.5047	/	/	-1.84941
RchiOBHm_Chr2g0111251	PAS2B	PREDICTED: very-long-chain (3R)-3-hydroxyacyl-CoA dehydratase PASTICCINO 2A [Fragaria vesca subsp. vesca] [Fragaria vesca]	1.52435	/	/	/
RchiOBHm_Chr4g0432171	KCR1	PREDICTED: very-long-chain 3-oxoacyl-CoA reductase 1-like [Fragaria vesca subsp. vesca] [Fragaria vesca]	3.20789	/	/	4.03914
RchiOBHm_Chr4g0432151	KCR1	PREDICTED: very-long-chain 3-oxoacyl-CoA reductase 1-like [Fragaria vesca subsp. vesca] [Fragaria vesca]	8.09452	/	/	/
RchiOBHm_Chr2g0143221	HTH	PREDICTED: protein HOTHEAD [Fragaria vesca subsp. vesca] [Fragaria vesca]	1.90248	/	/	1.41929
RchiOBHm_Chr7g0197251	CYP86A22	PREDICTED: cytochrome P450 86A7 [Fragaria vesca subsp. vesca] [Fragaria vesca]	2.15624	/	-4.03971	/
RchiOBHm_Chr1g0355891	CYP86A2	PREDICTED: cytochrome P450 86A8-like [Fragaria vesca subsp. vesca] [Fragaria vesca]	2.74874	1.07676	-2.30625	2.47865
RchiOBHm_Chr1g0343431	CER1	PREDICTED: protein ECERIFERUM 1-like [Fragaria vesca subsp. vesca] [Fragaria vesca]	2.16993	1.44175	-4.14048	/
RchiOBHm_Chr1g0343371	CER1	PREDICTED: protein ECERIFERUM 1-like [Fragaria vesca subsp. vesca] [Fragaria vesca]	-3.01092	-5.30886	-9.73884	-1.55562
RchiOBHm_Chr6g0289121	CYP94A1	PREDICTED: cytochrome P450 94A1-like [Fragaria vesca subsp. vesca] [Fragaria vesca]	-3.85626	/	-3.74462	-3.88982
RchiOBHm_Chr1g0343301	CER1	PREDICTED: protein ECERIFERUM 1-like [Fragaria vesca subsp. vesca] [Fragaria vesca]	3.16146	2.01886	3.24393	/
RchiOBHm_Chr5g0043321	FAR1	PREDICTED: fatty acyl-CoA reductase 1-like [Fragaria vesca subsp. vesca] [Fragaria vesca]	1.52517	/	-9.02237	/
RchiOBHm_Chr5g0069691	PLC4	PREDICTED: phosphoinositide phospholipase C 4-like isoform X1 [Fragaria vesca subsp. vesca] [Fragaria vesca]	/	2.96986	-1.53987	/
RchiOBHm_Chr1g0377761	--	PREDICTED: uncharacterized protein LOC101314133 [Fragaria vesca subsp. vesca] [Fragaria vesca]	/	1.4179	/	/
RchiOBHm_Chr2g0157881	LIP2	PREDICTED: triacylglycerol lipase 2-like [Fragaria vesca subsp. vesca] [Fragaria vesca]	/	1.20701	1.83763	/
RchiOBHm_Chr5g0033141	At5g55050	PREDICTED: GDSL esterase/lipase At5g55050-like [Fragaria vesca subsp. vesca] [Fragaria vesca]	/	1.13327	/	/
RchiOBHm_Chr5g0052751	At1g51440	PREDICTED: phospholipase A1-Igamma3, chloroplastic [Prunus mume]	/	-4.36923	-4.9542	2.05143
RchiOBHm_Chr6g0311401	CNMT	PREDICTED: (S)-coclaurine N-methyltransferase [Fragaria vesca subsp. vesca] [Fragaria vesca]	/	-1.63124	-4.22323	/
RchiOBHm_Chr7g0230861	At1g71691	PREDICTED: GDSL esterase/lipase At1g71691 [Fragaria vesca subsp. vesca] [Fragaria vesca]	/	2.03993	/	1.26181
RchiOBHm_Chr2g0090001	AIM1	PREDICTED: peroxisomal fatty acid beta-oxidation multifunctional protein AIM1 [Fragaria vesca subsp. vesca] [Fragaria vesca]	/	1.00376	2.40734	/
RchiOBHm_Chr2g0115091	ACX2	PREDICTED: acyl-coenzyme A oxidase 2, peroxisomal [Fragaria vesca subsp. vesca] [Fragaria vesca]	/	1.35123	2.99775	/
RchiOBHm_Chr2g0155721	LACS8	PREDICTED: long chain acyl-CoA synthetase 8 [Fragaria vesca subsp. vesca] [Fragaria vesca]	/	-3.70044	/	/
RchiOBHm_Chr2g0157571	KAS	PREDICTED: 3-oxoacyl-[acyl-carrier-protein] synthase, mitochondrial [Fragaria vesca subsp. vesca] [Fragaria vesca]	/	-1.40465	-2.38119	/
RchiOBHm_Chr3g0479761	FAD2	PREDICTED: omega-6 fatty acid desaturase, endoplasmic reticulum isozyme 2-like [Fragaria vesca subsp. vesca] [Fragaria vesca]	/	-1.47305	1.47453	/
RchiOBHm_Chr3g0481201	ACX1	PREDICTED: peroxisomal acyl-coenzyme A oxidase 1-like [Prunus mume]	/	-2.60126	-2.44509	-1.86251
RchiOBHm_Chr4g0432081	KCR1	PREDICTED: very-long-chain 3-oxoacyl-CoA reductase 1-like [Fragaria vesca subsp. vesca] [Fragaria vesca]	/	-1.01242	-1.80847	/
RchiOBHm_Chr6g0255211	MFP2	PREDICTED: peroxisomal fatty acid beta-oxidation multifunctional protein MFP2 [Prunus mume]	/	-1.67807	/	/
RchiOBHm_Chr6g0261071	LACS5	Long chain acyl-CoA synthetase 2 [Glycine soja]	/	1.38447	/	/
RchiOBHm_Chr6g0261081	--	PREDICTED: long chain acyl-CoA synthetase 2 [Citrus sinensis]	/	1.98911	/	1.82123
RchiOBHm_Chr6g0261651	LACS2	PREDICTED: long chain acyl-CoA synthetase 2-like [Prunus mume]	/	1.48206	2.07635	/
RchiOBHm_Chr6g0261891	LACS2	PREDICTED: long chain acyl-CoA synthetase 2 [Fragaria vesca subsp. vesca] [Fragaria vesca]	/	1.23113	-1.46602	/
RchiOBHm_Chr6g0261911	LACS2	PREDICTED: long chain acyl-CoA synthetase 2 [Fragaria vesca subsp. vesca] [Fragaria vesca]	/	-1.28207	-3.90517	-1.46935
RchiOBHm_Chr6g0262351	DET2	PREDICTED: very-long-chain enoyl-CoA reductase-like [Fragaria vesca subsp. vesca] [Fragaria vesca]	/	-1.18488	-1.61096	/
RchiOBHm_Chr6g0285181	PED1	PREDICTED: 3-ketoacyl-CoA thiolase 2, peroxisomal-like [Fragaria vesca subsp. vesca] [Fragaria vesca]	/	1.33885	/	1.10261
RchiOBHm_Chr7g0239931	ACC1	PREDICTED: acetyl-CoA carboxylase 1-like isoform X1 [Fragaria vesca subsp. vesca] [Fragaria vesca]	/	1.79024	/	1.31047
RchiOBHm_Chr2g0089951	FACT	PREDICTED: omega-hydroxypalmitate O-feruloyl transferase [Fragaria vesca subsp. vesca] [Fragaria vesca]	/	4.79998	4.16993	/
RchiOBHm_Chr2g0176041	HHT1	PREDICTED: omega-hydroxypalmitate O-feruloyl transferase-like isoform X1 [Fragaria vesca subsp. vesca] [Fragaria vesca]	/	-2.19167	/	-3.95306
RchiOBHm_Chr4g0432631	CYP86B1	PREDICTED: cytochrome P450 86B1-like [Fragaria vesca subsp. vesca] [Fragaria vesca]	/	7.88671	9.90187	/
RchiOBHm_Chr5g0068771	CYP86A1	PREDICTED: cytochrome P450 86A1 [Fragaria vesca subsp. vesca] [Fragaria vesca]	/	-2.26303	-2.66558	-2.87971
RchiOBHm_Chr6g0289131	CYP94A2	PREDICTED: cytochrome P450 94A1-like [Fragaria vesca subsp. vesca] [Fragaria vesca]	/	3.32797	7.84948	-1.91194
RchiOBHm_Chr6g0299671	BAT1	PREDICTED: omega-hydroxypalmitate O-feruloyl transferase [Fragaria vesca subsp. vesca] [Fragaria vesca]	/	-2.83872	-4.53916	-9.27612
RchiOBHm_Chr7g0189511	HHT1	PREDICTED: omega-hydroxypalmitate O-feruloyl transferase-like [Fragaria vesca subsp. vesca] [Fragaria vesca]	/	-3.29928	-5.0601	/
RchiOBHm_Chr3g0463931	DET2	PREDICTED: steroid 5-alpha-reductase DET2 [Fragaria vesca subsp. vesca] [Fragaria vesca]	/	/	-3.38313	/
RchiOBHm_Chr2g0105081	PLP1	PREDICTED: patatin-like protein 1 [Fragaria vesca subsp. vesca] [Fragaria vesca]	/	/	7.91724	/
RchiOBHm_Chr7g0204811	At4g16820	PREDICTED: phospholipase A1-Ibeta2, chloroplastic [Fragaria vesca subsp. vesca] [Fragaria vesca]	/	/	-4.17201	/
RchiOBHm_Chr7g0193421	At5g62930	PREDICTED: GDSL esterase/lipase At5g62930 [Fragaria vesca subsp. vesca] [Fragaria vesca]	/	/	-2.67673	/
RchiOBHm_Chr2g0104931	PLP1	PREDICTED: patatin-like protein 2 [Fragaria vesca subsp. vesca] [Fragaria vesca]	/	/	7.71425	/
RchiOBHm_Chr0c38g0503001	LACS2	PREDICTED: long chain acyl-CoA synthetase 2 [Fragaria vesca subsp. vesca] [Fragaria vesca]	/	/	-1.97912	/
RchiOBHm_Chr3g0447411	ACPD	PREDICTED: acyl-[acyl-carrier-protein] desaturase, chloroplastic-like [Fragaria vesca subsp. vesca] [Fragaria vesca]	/	/	1.25007	/
RchiOBHm_Chr4g0385141	PED1	PREDICTED: 3-ketoacyl-CoA thiolase 2, peroxisomal [Fragaria vesca subsp. vesca] [Fragaria vesca]	/	/	2.54177	/
RchiOBHm_Chr7g0204381	ppt-1	PREDICTED: palmitoyl-protein thioesterase 1-like [Fragaria vesca subsp. vesca] [Fragaria vesca]	/	/	1.3041	/
RchiOBHm_Chr3g0462821	ACX4	PREDICTED: acyl-coenzyme A oxidase 4, peroxisomal [Fragaria vesca subsp. vesca] [Fragaria vesca]	/	/	1.16323	/
RchiOBHm_Chr1g0367031	ECR	PREDICTED: very-long-chain enoyl-CoA reductase [Fragaria vesca subsp. vesca] [Fragaria vesca]	/	/	-2.57409	/
RchiOBHm_Chr4g0423051	MFP2	PREDICTED: peroxisomal fatty acid beta-oxidation multifunctional protein MFP2 [Fragaria vesca subsp. vesca] [Fragaria vesca]	/	/	1.19868	/
RchiOBHm_Chr5g0080511	MOD1	PREDICTED: enoyl-[acyl-carrier-protein] reductase [NADH], chloroplastic [Fragaria vesca subsp. vesca] [Fragaria vesca]	/	/	-3.95179	/
RchiOBHm_Chr5g0062801	HACD2	PREDICTED: very-long-chain (3R)-3-hydroxyacyl-CoA dehydratase 2 [Fragaria vesca subsp. vesca] [Fragaria vesca]	/	/	-2.40544	/
RchiOBHm_Chr7g0206361	ACX3	PREDICTED: acyl-coenzyme A oxidase 3, peroxisomal-like isoform X2 [Fragaria vesca subsp. vesca] [Fragaria vesca]	/	/	-3.35701	/
RchiOBHm_Chr1g0347441	ppt-1	PREDICTED: palmitoyl-protein thioesterase 1 [Fragaria vesca subsp. vesca] [Fragaria vesca]	/	/	-2.71144	/
RchiOBHm_Chr4g0425091	ADS3	PREDICTED: palmitoyl-monogalactosyldiacylglycerol delta-7 desaturase, chloroplastic-like [Fragaria vesca subsp. vesca] [Fragaria vesca]	/	/	10.1207	/
RchiOBHm_Chr4g0431201	CLKR27	PREDICTED: 3-oxoacyl-[acyl-carrier-protein] reductase 4-like [Fragaria vesca subsp. vesca] [Fragaria vesca]	/	/	-3.00529	/
RchiOBHm_Chr5g0050721	ADS3	PREDICTED: palmitoyl-monogalactosyldiacylglycerol delta-7 desaturase, chloroplastic-like [Fragaria vesca subsp. vesca] [Fragaria vesca]	/	/	4.11548	/
RchiOBHm_Chr1g0351481	LACS5	PREDICTED: long chain acyl-CoA synthetase 2-like [Prunus mume]	/	/	-4.11151	/
RchiOBHm_Chr3g0487031	LACS1	PREDICTED: long chain acyl-CoA synthetase 1-like [Fragaria vesca subsp. vesca] [Fragaria vesca]	/	/	-2.01022	1.61039
RchiOBHm_Chr4g0405901	ACPD	PREDICTED: acyl-[acyl-carrier-protein] desaturase, chloroplastic [Fragaria vesca subsp. vesca] [Fragaria vesca]	/	/	-1.48937	/
RchiOBHm_Chr2g0115241	fabZ	Thioesterase superfamily protein isoform 1 [Theobroma cacao]	/	/	-1.95703	/
RchiOBHm_Chr2g0095651	KAS2	PREDICTED: 3-oxoacyl-[acyl-carrier-protein] synthase II, chloroplastic-like [Malus domestica]	/	/	-1.51131	/
RchiOBHm_Chr6g0262661	LACS2	PREDICTED: long chain acyl-CoA synthetase 2 [Fragaria vesca subsp. vesca] [Fragaria vesca]	/	/	-2.20299	/
MSTRG.11083	AAE15	PREDICTED: probable acyl-activating enzyme 16, chloroplastic [Fragaria vesca subsp. vesca] [Fragaria vesca]	/	/	1.17142	/
RchiOBHm_Chr6g0261521	LACS2	PREDICTED: long chain acyl-CoA synthetase 2 [Fragaria vesca subsp. vesca] [Fragaria vesca]	/	/	-2.95842	/
RchiOBHm_Chr4g0395021	PXG2	PREDICTED: peroxygenase [Fragaria vesca subsp. vesca] [Fragaria vesca]	/	/	8.22882	/
RchiOBHm_Chr6g0289001	CYP94A1	PREDICTED: cytochrome P450 94A1-like [Fragaria vesca subsp. vesca] [Fragaria vesca]	/	/	-3.85505	/
RchiOBHm_Chr1g0343261	CER1	PREDICTED: protein ECERIFERUM 1-like [Fragaria vesca subsp. vesca] [Fragaria vesca]	/	/	-4.3821	-1.25435
RchiOBHm_Chr4g0439461	CYP704B1	PREDICTED: cytochrome P450 704B1 [Fragaria vesca subsp. vesca] [Fragaria vesca]	/	/	2.59946	/
RchiOBHm_Chr6g0289101	CYP94A1	PREDICTED: cytochrome P450 94A1-like [Fragaria vesca subsp. vesca] [Fragaria vesca]	/	/	1.2251	/
RchiOBHm_Chr4g0443291	PXG4	PREDICTED: probable peroxygenase 4 [Fragaria vesca subsp. vesca] [Fragaria vesca]	/	/	-3.15908	/
RchiOBHm_Chr7g0198851	FAR4	PREDICTED: fatty acyl-CoA reductase 3-like [Prunus mume]	/	/	1.43558	/
All data are shown log2 Ratio, and positive and negative values of Log2 Ratio are either up- or down-regulated genes in the four pair-comparisons. No significant fold changes are indicated as “/”
