# Supplementary material for: Comparative Transcriptome Analysis Reveals Molecular Mechanism and Regulatory Network of Rosa Chinensis ‘Old Blush’ Leaves in Response to Drought Stress
Source: Research Square preprint supplement (doi:10.21203/rs.3.rs-112819/v1), 2020-11-24
Supplement: Supplementary file 7 [file d89f4d345c62fcf360fee528.xlsx]

## Sheet: Sheet1
Table S7 Differently-expressed related to hormone metabolism and signaling in response to drought treatment
	Genes ID	Gene name	Description	Log2 fold change(DT1/CK)	Log2 fold change(DT2/CK)	Log2 fold change(DT3/CK)	Log2 fold change(RW/CK)
abscisic acid	RchiOBHm_Chr5g0066401	PP2CA	PREDICTED: probable protein phosphatase 2C 24 [Fragaria vesca subsp. vesca] [Fragaria vesca]	1.46832	4.21103	4.86772	1.56685
	RchiOBHm_Chr1g0371101	PYL4	PREDICTED: abscisic acid receptor PYL4 [Fragaria vesca subsp. vesca] [Fragaria vesca]	-2.62614	-3.50007	/	-3.20789
	RchiOBHm_Chr5g0014331	NCED3	9-cis-epoxycarotenoid dioxygenase [Fragaria x ananassa]	2.70125	/	/	/
	RchiOBHm_Chr3g0468121	PP2C38	PREDICTED: probable protein phosphatase 2C 38 [Fragaria vesca subsp. vesca] [Fragaria vesca]	1.31918	/	-3.29921	/
	RchiOBHm_Chr7g0215951	PP2C27	PREDICTED: probable protein phosphatase 2C 27 [Fragaria vesca subsp. vesca] [Fragaria vesca]	1.06282	/	/	/
	RchiOBHm_Chr7g0215351	CYP707A1	PREDICTED: abscisic acid 8'-hydroxylase 1-like [Fragaria vesca subsp. vesca] [Fragaria vesca]	-4.1376	2.36658	/	/
	RchiOBHm_Chr4g0393921	At4g28400	phosphatase 2C (PP2C)-like protein [Corchorus capsularis]	1.54203	/	/	/
	RchiOBHm_Chr5g0065871	CYP707A2	PREDICTED: abscisic acid 8'-hydroxylase 2 [Fragaria vesca subsp. vesca] [Fragaria vesca]	1.29181	2.16204	/	/
	RchiOBHm_Chr6g0264491	RBG7	PREDICTED: glycine-rich RNA-binding, abscisic acid-inducible protein-like isoform X1 [Fragaria vesca subsp. vesca] [Fragaria vesca]	-2.30351	-3.39495	/	/
	RchiOBHm_Chr2g0100851	ROT3	PREDICTED: abscisic acid 8'-hydroxylase 3-like [Fragaria vesca subsp. vesca] [Fragaria vesca]	-1.29629	-1.20926	-3.80128	-2.09433
	RchiOBHm_Chr7g0206351	ABA4	PREDICTED: protein ABA DEFICIENT 4, chloroplastic-like [Prunus mume]	-1.19346	/	2.68972	/
	RchiOBHm_Chr2g0091801	PP2C06	PREDICTED: probable protein phosphatase 2C 6 [Fragaria vesca subsp. vesca] [Fragaria vesca]	/	1.38261	3.01517	/
	RchiOBHm_Chr3g0461781	PYL4	PREDICTED: abscisic acid receptor PYL4 [Fragaria vesca subsp. vesca] [Fragaria vesca]	/	-1.53918	/	-1.58664
	RchiOBHm_Chr5g0010921	PYL12	PREDICTED: abscisic acid receptor PYL12-like [Fragaria vesca subsp. vesca] [Fragaria vesca]	/	-3.87538	/	/
	RchiOBHm_Chr7g0209681	PYL1	PREDICTED: abscisic acid receptor PYR1-like isoform X2 [Fragaria vesca subsp. vesca] [Fragaria vesca]	/	-2.06086	/	/
	RchiOBHm_Chr6g0307951	CYP707A7	PREDICTED: abscisic acid 8'-hydroxylase 4-like [Fragaria vesca subsp. vesca] [Fragaria vesca]	/	-1.59335	-3.68081	/
	RchiOBHm_Chr1g0368301	P2CA	PREDICTED: protein phosphatase 2C 37 [Fragaria vesca subsp. vesca] [Fragaria vesca]	/	/	1.36381	/
	RchiOBHm_Chr6g0301491	CYP90D2	PREDICTED: abscisic acid 8'-hydroxylase 1 isoform X1 [Fragaria vesca subsp. vesca] [Fragaria vesca]	/	/	-3.79796	/
	RchiOBHm_Chr2g0105701	ZEP	zeaxanthin epoxidase [Fragaria x ananassa]	/	/	-3.34084	/
	RchiOBHm_Chr4g0397001	NCED6	PREDICTED: 9-cis-epoxycarotenoid dioxygenase NCED6, chloroplastic [Fragaria vesca subsp. vesca] [Fragaria vesca]	/	/	-9.39518	/
	RchiOBHm_Chr5g0049511	AAO3	PREDICTED: abscisic-aldehyde oxidase [Fragaria vesca subsp. vesca] [Fragaria vesca]	/	/	-1.2173	/
	RchiOBHm_Chr6g0257401	CYP707A4	PREDICTED: abscisic acid 8'-hydroxylase 4 [Fragaria vesca subsp. vesca] [Fragaria vesca]	/	/	/	-1.78741
auxin	RchiOBHm_Chr7g0178461	PIN1C	auxin efflux carrier [Rosa canina]	1.28284	/	-6.63459	1.16553
	RchiOBHm_Chr6g0289571	AUX28	PREDICTED: auxin-induced protein AUX28-like [Fragaria vesca subsp. vesca] [Fragaria vesca]	2.4856	/	-5.50452	/
	RchiOBHm_Chr6g0244221	LAX2	PREDICTED: auxin transporter-like protein 2 [Fragaria vesca subsp. vesca] [Fragaria vesca]	3.08746	/	/	2.8413
	RchiOBHm_Chr4g0389621	IAA14	PREDICTED: auxin-responsive protein IAA14-like [Fragaria vesca subsp. vesca] [Fragaria vesca]	1.18722	/	-4.431	/
	RchiOBHm_Chr4g0389611	AUX22D	PREDICTED: auxin-responsive protein IAA4 [Fragaria vesca subsp. vesca] [Fragaria vesca]	1.01841	-1.04501	-9.95763	/
	RchiOBHm_Chr7g0210731	ARG7	PREDICTED: auxin-induced protein 15A-like [Fragaria vesca subsp. vesca] [Fragaria vesca]	3.0009	/	/	/
	RchiOBHm_Chr6g0268551	SAUR50	PREDICTED: auxin-induced protein 15A-like [Fragaria vesca subsp. vesca] [Fragaria vesca]	2.69677	-2.00434	/	/
	RchiOBHm_Chr1g0349431	SAUR36	PREDICTED: auxin-responsive protein SAUR36-like [Malus domestica]	-1.35345	-1.29316	/	/
	RchiOBHm_Chr7g0210621	ARG7	PREDICTED: auxin-induced protein 15A-like [Fragaria vesca subsp. vesca] [Fragaria vesca]	9.64985	/	/	/
	RchiOBHm_Chr6g0268871	SAUR20	PREDICTED: auxin-induced protein X10A-like [Fragaria vesca subsp. vesca] [Fragaria vesca]	9.81911	/	/	/
	RchiOBHm_Chr6g0302561	--	PREDICTED: auxin-induced protein 6B [Fragaria vesca subsp. vesca] [Fragaria vesca]	1.98406	/	1.05445	/
	RchiOBHm_Chr2g0094781	ABP19A	PREDICTED: auxin-binding protein ABP19a-like [Fragaria vesca subsp. vesca] [Fragaria vesca]	7.40953	7.30537	/	/
	RchiOBHm_Chr5g0058761	ARF18	PREDICTED: auxin response factor 18-like [Fragaria vesca subsp. vesca] [Fragaria vesca]	1.30555	/	-3.79116	/
	RchiOBHm_Chr2g0146781	At1g54070	PREDICTED: auxin-repressed 12.5 kDa protein isoform X1 [Fragaria vesca subsp. vesca] [Fragaria vesca]	1.03375	-1.03107	/	/
	RchiOBHm_Chr4g0441311	PIN3	PREDICTED: auxin efflux carrier component 3-like [Fragaria vesca subsp. vesca] [Fragaria vesca]	1.17506	/	-3.01566	/
	RchiOBHm_Chr5g0026611	SAUR77	PREDICTED: auxin-responsive protein SAUR71-like [Pyrus x bretschneideri]	9.78136	8.99435	/	/
	RchiOBHm_Chr6g0283381	At4g12980	PREDICTED: auxin-induced in root cultures protein 12 [Fragaria vesca subsp. vesca] [Fragaria vesca]	1.09796	/	-2.68559	/
	RchiOBHm_Chr6g0295041	LAX3	AUX1 [Fragaria x ananassa]	1.65019	/	2.44333	2.63656
	RchiOBHm_Chr2g0091261	IAA27	PREDICTED: auxin-responsive protein IAA27 [Fragaria vesca subsp. vesca] [Fragaria vesca]	/	-1.21992	-4.77379	/
	RchiOBHm_Chr3g0463551	LAX2	PREDICTED: auxin transporter-like protein 2 [Fragaria vesca subsp. vesca] [Fragaria vesca]	/	-1.61991	-5.92636	/
	RchiOBHm_Chr5g0009381	ARF3	PREDICTED: auxin response factor 3 [Fragaria vesca subsp. vesca] [Fragaria vesca]	/	-1.32698	-4.41212	/
	RchiOBHm_Chr6g0302551	ARF5	PREDICTED: auxin response factor 5 [Fragaria vesca subsp. vesca] [Fragaria vesca]	/	1.46787	2.60154	/
	RchiOBHm_Chr7g0186081	ARF9	PREDICTED: auxin response factor 9 isoform X1 [Fragaria vesca subsp. vesca] [Fragaria vesca]	/	/	-3.60192	/
	RchiOBHm_Chr3g0470221	SAUR72	PREDICTED: auxin-responsive protein SAUR40-like [Pyrus x bretschneideri]	/	/	-9.64386	/
brassinosteroid	RchiOBHm_Chr4g0437751	CYP734A1	PREDICTED: cytochrome P450 CYP749A22-like [Fragaria vesca subsp. vesca] [Fragaria vesca]	-2.07004	/	-3.01264	-2.41989
	RchiOBHm_Chr5g0025711	CYP734A1	PREDICTED: cytochrome P450 CYP749A22-like isoform X1 [Fragaria vesca subsp. vesca] [Fragaria vesca]	3.10227	1.86668	-10.4581	3.68803
	RchiOBHm_Chr4g0420631	CYP72A68	PREDICTED: cytochrome P450 CYP749A22-like [Fragaria vesca subsp. vesca] [Fragaria vesca]	-2.18628	-1.76243	/	/
	RchiOBHm_Chr4g0437521	CYP734A1	PREDICTED: cytochrome P450 CYP749A22-like [Prunus mume]	-1.78022	-1.7464	-4.33695	-2.1633
	RchiOBHm_Chr6g0272651	CYP734A1	PREDICTED: cytochrome P450 CYP749A22-like isoform X1 [Fragaria vesca subsp. vesca] [Fragaria vesca]	-9.27612	-5.9542	/	-2.78427
	RchiOBHm_Chr1g0339431	CYP734A1	PREDICTED: cytochrome P450 CYP749A22-like [Prunus mume]	-4.30518	-2.57936	-3.22426	-6.00562
	RchiOBHm_Chr2g0095221	CYP75B2	PREDICTED: flavonoid 3'-monooxygenase-like [Fragaria vesca subsp. vesca] [Fragaria vesca]	5.27302	/	/	6.29768
	RchiOBHm_Chr2g0089381	CYP734A1	PREDICTED: cytochrome P450 734A1 [Fragaria vesca subsp. vesca] [Fragaria vesca]	1.16802	/	/	/
	RchiOBHm_Chr4g0437431	CYP734A1	PREDICTED: cytochrome P450 CYP749A22-like [Prunus mume]	4.45943	/	/	/
	RchiOBHm_Chr2g0155501	CYP724B1	PREDICTED: cytochrome P450 724B1-like [Fragaria vesca subsp. vesca] [Fragaria vesca]	3.8413	/	/	/
	RchiOBHm_Chr1g0337981	CYP72A68	PREDICTED: cytochrome P450 CYP749A22-like [Fragaria vesca subsp. vesca] [Fragaria vesca]	/	-1.24885	-3.05123	/
	RchiOBHm_Chr1g0337991	CYP72A154	PREDICTED: cytochrome P450 CYP749A22-like [Fragaria vesca subsp. vesca] [Fragaria vesca]	/	-1.33573	-3.21483	/
	RchiOBHm_Chr1g0339421	CYP72A15	PREDICTED: cytochrome P450 CYP749A22-like [Fragaria vesca subsp. vesca] [Fragaria vesca]	/	-2.43177	-3.89724	-1.48498
	RchiOBHm_Chr2g0094941	CYP75B2	PREDICTED: flavonoid 3'-monooxygenase-like [Fragaria vesca subsp. vesca] [Fragaria vesca]	/	-2.90111	-7.96	/
	RchiOBHm_Chr2g0165151	BA13	PREDICTED: cytochrome P450 85A isoform X2 [Fragaria vesca subsp. vesca] [Fragaria vesca]	/	-1.20228	/	-1.70029
	RchiOBHm_Chr4g0402401	CYP734A1	PREDICTED: cytochrome P450 CYP749A22-like [Prunus mume]	/	-1.89005	-6.28383	-1.23016
	RchiOBHm_Chr2g0142901	CYP90D1	PREDICTED: 3-epi-6-deoxocathasterone 23-monooxygenase isoform X2 [Fragaria vesca subsp. vesca] [Fragaria vesca]	/	/	-3.60892	/
	RchiOBHm_Chr6g0300561	BZR1	PREDICTED: protein BRASSINAZOLE-RESISTANT 1 [Fragaria vesca subsp. vesca] [Fragaria vesca]	/	1.08714	-1.47999	/
	RchiOBHm_Chr5g0074361	BRL1	PREDICTED: receptor-like protein kinase BRI1-like 3 [Fragaria vesca subsp. vesca] [Fragaria vesca]	/	/	1.19184	/
	RchiOBHm_Chr2g0101791	CYP90B1	PREDICTED: cytochrome P450 90B1 [Fragaria vesca subsp. vesca] [Fragaria vesca]	/	/	-1.72274	1.00414
	RchiOBHm_Chr5g0074401	BRL3	PREDICTED: receptor-like protein kinase BRI1-like 3 [Fragaria vesca subsp. vesca] [Fragaria vesca]	/	/	1.42498	/
	RchiOBHm_Chr1g0370071	CYP90A1	PREDICTED: cytochrome P450 90A1 [Fragaria vesca subsp. vesca] [Fragaria vesca]	/	/	-2.03132	1.86337
cytokinin	RchiOBHm_Chr6g0301781	CKX5	cytokinin dehydrogenase 5 [Rosa canina]	1.50434	/	/	1.13465
	RchiOBHm_Chr2g0093491	CKX3	PREDICTED: cytokinin dehydrogenase 3 [Fragaria vesca subsp. vesca] [Fragaria vesca]	-1.75987	-3.0114	-7.40372	-4.2338
	RchiOBHm_Chr6g0311781	CKX7	PREDICTED: cytokinin dehydrogenase 7 [Fragaria vesca subsp. vesca] [Fragaria vesca]	1.31256	/	/	/
	RchiOBHm_Chr1g0319331	CKX6	PREDICTED: cytokinin dehydrogenase 6-like [Fragaria vesca subsp. vesca] [Fragaria vesca]	2.19398	/	-2.96253	/
	RchiOBHm_Chr1g0377591	CYP735A2	PREDICTED: cytokinin hydroxylase-like [Malus domestica]	2.17971	/	/	1.55522
	RchiOBHm_Chr5g0058621	LOG1	PREDICTED: cytokinin riboside 5'-monophosphate phosphoribohydrolase LOG1 isoform X1 [Fragaria vesca subsp. vesca] [Fragaria vesca]	/	1.18376	/	1.06274
	RchiOBHm_Chr6g0279791	LOG5	PREDICTED: cytokinin riboside 5'-monophosphate phosphoribohydrolase LOG5 [Prunus mume]	/	-1.04576	-2.93756	/
	RchiOBHm_Chr5g0042111	--	PREDICTED: probable cytokinin riboside 5'-monophosphate phosphoribohydrolase LOGL10 [Fragaria vesca subsp. vesca] [Fragaria vesca]	/	-1.17241	/	/
	RchiOBHm_Chr6g0311211	LOG8	PREDICTED: cytokinin riboside 5'-monophosphate phosphoribohydrolase LOG8 [Fragaria vesca subsp. vesca] [Fragaria vesca]	/	/	-1.50726	-1.34637
	RchiOBHm_Chr3g0469741	LOG3	PREDICTED: cytokinin riboside 5'-monophosphate phosphoribohydrolase LOG3 [Fragaria vesca subsp. vesca] [Fragaria vesca]	/	/	1.62244	/
	RchiOBHm_Chr5g0042181	--	PREDICTED: probable cytokinin riboside 5'-monophosphate phosphoribohydrolase LOGL10 [Fragaria vesca subsp. vesca] [Fragaria vesca]	/	/	-1.82501	/
	RchiOBHm_Chr6g0291431	IPT3	IPT3 [Rosa hybrid cultivar]	/	/	/	-1.99335
ethylene	RchiOBHm_Chr6g0294491	ERS1	ethylene receptor [Fragaria x ananassa]	1.67272	/	-1.58725
	RchiOBHm_Chr1g0360021	ERF023	PREDICTED: ethylene-responsive transcription factor ERF023 [Fragaria vesca subsp. vesca] [Fragaria vesca]	3.70422	/	-5.01872	3.72436
	RchiOBHm_Chr3g0462291	ETO1	PREDICTED: ethylene-overproduction protein 1 [Fragaria vesca subsp. vesca] [Fragaria vesca]	1.25337	/	-2.41971	1.10466
	RchiOBHm_Chr6g0299771	ERF003	PREDICTED: ethylene-responsive transcription factor ERF003-like [Fragaria vesca subsp. vesca] [Fragaria vesca]	1.10455	1.397	/	/
	RchiOBHm_Chr7g0196631	ACS1	PREDICTED: 1-aminocyclopropane-1-carboxylate synthase [Fragaria vesca subsp. vesca] [Fragaria vesca]	-1.47573	-2.04947	-2.04947	/
	RchiOBHm_Chr5g0001831	ACO2	PREDICTED: 1-aminocyclopropane-1-carboxylate oxidase 1 [Fragaria vesca subsp. vesca] [Fragaria vesca]	1.66279	/	/	/
	RchiOBHm_Chr4g0422061	ACS10	1-aminocyclopropane-1-carboxylate synthase [Rosa hybrid cultivar]	/	-4.54432	-7.86625	/
	RchiOBHm_Chr1g0357641	ACS1	PREDICTED: 1-aminocyclopropane-1-carboxylate synthase 1-like [Fragaria vesca subsp. vesca] [Fragaria vesca]	/	/	9.40621	/
	RchiOBHm_Chr5g0034791	ACS10	1-aminocyclopropane-1-carboxylate synthase [Rosa hybrid cultivar]	/	/	1.45144	/
	RchiOBHm_Chr7g0200401	ACS10	1-aminocyclopropane-1-carboxylate synthase [Rosa hybrid cultivar]	/	/	-2.7845	/
	RchiOBHm_Chr2g0093091	ACO1	PREDICTED: 1-aminocyclopropane-1-carboxylate oxidase 1-like [Fragaria vesca subsp. vesca] [Fragaria vesca]	/	/	7.26053	/
	RchiOBHm_Chr2g0140341	ACO1	PREDICTED: 1-aminocyclopropane-1-carboxylate oxidase 4 [Fragaria vesca subsp. vesca] [Fragaria vesca]	/	/	/	2.18057
	RchiOBHm_Chr4g0401801	AIL5	PREDICTED: AP2-like ethylene-responsive transcription factor AIL5 [Fragaria vesca subsp. vesca] [Fragaria vesca]	1.08006	/	-3.9386	/
	RchiOBHm_Chr1g0346421	ERF034	PREDICTED: ethylene-responsive transcription factor ERF034-like [Fragaria vesca subsp. vesca] [Fragaria vesca]	3.57905	/	/	2.33133
	RchiOBHm_Chr6g0298011	SHN2	PREDICTED: ethylene-responsive transcription factor SHINE 2-like [Fragaria vesca subsp. vesca] [Fragaria vesca]	3.42481	/	-8.58246	3.74322
	RchiOBHm_Chr6g0274591	ERF110	PREDICTED: ethylene-responsive transcription factor ABR1-like isoform X1 [Fragaria vesca subsp. vesca] [Fragaria vesca]	2.57386	4.65003	7.33828	/
	RchiOBHm_Chr2g0088321	WIN1	PREDICTED: ethylene-responsive transcription factor WIN1-like [Fragaria vesca subsp. vesca] [Fragaria vesca]	5.5325	/	/	3.91146
	RchiOBHm_Chr6g0310091	ANT	PREDICTED: AP2-like ethylene-responsive transcription factor ANT [Fragaria vesca subsp. vesca] [Fragaria vesca]	5.5325	1.89308	1.58496	/
	RchiOBHm_Chr2g0132251	At1g16060	PREDICTED: AP2-like ethylene-responsive transcription factor At1g16060 [Fragaria vesca subsp. vesca] [Fragaria vesca]	2.49643	/	3.92735	/
	RchiOBHm_Chr7g0230931	WIN1	PREDICTED: LOW QUALITY PROTEIN: ethylene-responsive transcription factor WIN1-like [Fragaria vesca subsp. vesca] [Fragaria vesca]	1.60446	-5.02975	-9.35168	/
	RchiOBHm_Chr4g0392501	ERF1B	PREDICTED: ethylene-responsive transcription factor 1B [Fragaria vesca subsp. vesca] [Fragaria vesca]	-2.51685	/	/	-1.67796
	RchiOBHm_Chr6g0288231	ERF1B	PREDICTED: ethylene-responsive transcription factor 1B [Fragaria vesca subsp. vesca] [Fragaria vesca]	-1.44016	2.17218	/	-1.34293
	RchiOBHm_Chr6g0257181	ERF109	PREDICTED: ethylene-responsive transcription factor ERF109-like [Fragaria vesca subsp. vesca] [Fragaria vesca]	-6.6719	/	-8.24265	-2.65857
	RchiOBHm_Chr1g0373631	ERF5	PREDICTED: ethylene-responsive transcription factor ERF105-like [Fragaria vesca subsp. vesca] [Fragaria vesca]	-4.79698	-2.23633	-5.1009	-1.06799
	RchiOBHm_Chr2g0095581	ERF017	PREDICTED: ethylene-responsive transcription factor ERF017 [Fragaria vesca subsp. vesca] [Fragaria vesca]	-4.47084	-1.43383	-6.18709	-3.0657
	RchiOBHm_Chr5g0017411	--	ethylene-responsive nuclear family protein [Populus trichocarpa]	-1.96702	-1.68868	/	/
	RchiOBHm_Chr7g0204641	ERF1A	PREDICTED: ethylene-responsive transcription factor 2 [Fragaria vesca subsp. vesca] [Fragaria vesca]	-2.90932	1.05307	/	/
	RchiOBHm_Chr5g0032721	ERF4	PREDICTED: ethylene-responsive transcription factor 4 [Fragaria vesca subsp. vesca] [Fragaria vesca]	-2.01426	-1.46332	-4.65457	/
	RchiOBHm_Chr1g0373621	ERF2	PREDICTED: ethylene-responsive transcription factor 2-like [Fragaria vesca subsp. vesca] [Fragaria vesca]	-3.12445	/	/	/
	RchiOBHm_Chr7g0231501	ERF019	PREDICTED: ethylene-responsive transcription factor ERF020 [Fragaria vesca subsp. vesca] [Fragaria vesca]	-3.3689	1.87164	-1.82666	-1.49254
	RchiOBHm_Chr5g0008991	ERF4	PREDICTED: ethylene-responsive transcription factor 4 [Fragaria vesca subsp. vesca] [Fragaria vesca]	-1.99578	/	-2.62235	-1.38708
	RchiOBHm_Chr2g0126301	ERF053	PREDICTED: ethylene-responsive transcription factor ERF054-like [Fragaria vesca subsp. vesca] [Fragaria vesca]	-3.08746	1.90402	-4.68758	/
	RchiOBHm_Chr1g0376651	ERF026	PREDICTED: ethylene-responsive transcription factor ERF027 [Fragaria vesca subsp. vesca] [Fragaria vesca]	-3.61983	1.78804	-3.87688	/
	RchiOBHm_Chr6g0295481	ERF012	PREDICTED: ethylene-responsive transcription factor ERF014 [Fragaria vesca subsp. vesca] [Fragaria vesca]	-3.20945	/	-6.24233	/
	RchiOBHm_Chr7g0231481	ERF020	PREDICTED: ethylene-responsive transcription factor ERF020 [Fragaria vesca subsp. vesca] [Fragaria vesca]	-2.8233	2.66557	-2.86695	/
	RchiOBHm_Chr7g0204611	ERF5	PREDICTED: ethylene-responsive transcription factor 5 [Fragaria vesca subsp. vesca] [Fragaria vesca]	-2.47283	/	-3.10554	/
	RchiOBHm_Chr1g0347641	ERF2	PREDICTED: ethylene-responsive transcription factor ERF107-like [Fragaria vesca subsp. vesca] [Fragaria vesca]	-3.45865	/	-7.67818	/
	RchiOBHm_Chr4g0435261	ERF118	PREDICTED: ethylene-responsive transcription factor ERF118 [Fragaria vesca subsp. vesca] [Fragaria vesca]	-1.33068	/	/	-1.08581
	RchiOBHm_Chr4g0428891	ERF113	PREDICTED: ethylene-responsive transcription factor ERF113 [Fragaria vesca subsp. vesca] [Fragaria vesca]	-1.56005	/	2.41073	-2.92992
	RchiOBHm_Chr7g0185311	ERF118	PREDICTED: ethylene-responsive transcription factor ERF118-like [Fragaria vesca subsp. vesca] [Fragaria vesca]	-1.52572	/	-2.99139	-1.08515
	RchiOBHm_Chr7g0239701	RAP2-4	PREDICTED: ethylene-responsive transcription factor RAP2-4 [Fragaria vesca subsp. vesca] [Fragaria vesca]	-1.32085	/	/	-1.0245
	RchiOBHm_Chr4g0392461	ERF098	PREDICTED: ethylene-responsive transcription factor ERF098 [Fragaria vesca subsp. vesca] [Fragaria vesca]	-2.14633	-2.31955	-3.16755	-2.88681
	RchiOBHm_Chr2g0105481	RAP2-6	PREDICTED: ethylene-responsive transcription factor ERF109-like [Fragaria vesca subsp. vesca] [Fragaria vesca]	-4.078	3.5814	/	1.77305
	RchiOBHm_Chr7g0199231	ERF026	PREDICTED: ethylene-responsive transcription factor ERF027-like [Fragaria vesca subsp. vesca] [Fragaria vesca]	-2.05445	3.03999	-10.2992	/
	RchiOBHm_Chr7g0195581	ERF2	PREDICTED: ethylene-responsive transcription factor CRF2 [Fragaria vesca subsp. vesca] [Fragaria vesca]	-1.3505	-1.36864	-3.9445	-1.19063
	RchiOBHm_Chr7g0231631	ERF021	PREDICTED: ethylene-responsive transcription factor ERF021 [Fragaria vesca subsp. vesca] [Fragaria vesca]	/	4.03148	/	3.26568
	RchiOBHm_Chr1g0380021	ERF4	PREDICTED: ethylene-responsive transcription factor CRF4 [Fragaria vesca subsp. vesca] [Fragaria vesca]	/	1.67296	/	/
	RchiOBHm_Chr2g0105401	ERF4	PREDICTED: ethylene-responsive transcription factor ERF109-like [Fragaria vesca subsp. vesca] [Fragaria vesca]	/	3.72101	/	/
	RchiOBHm_Chr2g0105461	ERF109	PREDICTED: ethylene-responsive transcription factor ERF109-like [Fragaria vesca subsp. vesca] [Fragaria vesca]	/	2.70044	/	/
	RchiOBHm_Chr2g0105501	ERF109	PREDICTED: ethylene-responsive transcription factor ERF109-like [Fragaria vesca subsp. vesca] [Fragaria vesca]	/	4.69428	-4.80266	1.75053
	RchiOBHm_Chr2g0111031	AIL6	PREDICTED: AP2-like ethylene-responsive transcription factor AIL6 [Fragaria vesca subsp. vesca] [Fragaria vesca]	/	1.96153	/	/
	RchiOBHm_Chr4g0415231	ERF062	PREDICTED: ethylene-responsive transcription factor ERF062 [Fragaria vesca subsp. vesca] [Fragaria vesca]	/	2.81481	3.75184	/
	RchiOBHm_Chr2g0106241	ERF010	PREDICTED: ethylene-responsive transcription factor ERF008-like [Malus domestica]	/	-1.62414	-1.39804	/
	RchiOBHm_Chr2g0115041	ERF060	PREDICTED: ethylene-responsive transcription factor RAP2-4-like [Fragaria vesca subsp. vesca] [Fragaria vesca]	/	-1.11988	/	-1.83269
	RchiOBHm_Chr5g0070731	ETO1	PREDICTED: ethylene-overproduction protein 1-like [Fragaria vesca subsp. vesca] [Fragaria vesca]	/	-1.3519	-1.4986	/
	RchiOBHm_Chr6g0288281	ERF095	PREDICTED: ethylene-responsive transcription factor ERF098-like [Fragaria vesca subsp. vesca] [Fragaria vesca]	/	-1.49028	-4.18454	-1.37834
	RchiOBHm_Chr5g0078151	EIL3	PREDICTED: ETHYLENE INSENSITIVE 3-like 3 protein [Fragaria vesca subsp. vesca] [Fragaria vesca]	/	/	1.55964	/
	RchiOBHm_Chr7g0188681	ERF114	PREDICTED: ethylene-responsive transcription factor ERF113-like [Fragaria vesca subsp. vesca] [Fragaria vesca]	/	/	2.10272	-2.38635
	RchiOBHm_Chr7g0203971	ERF039	PREDICTED: ethylene-responsive transcription factor ERF039-like [Fragaria vesca subsp. vesca] [Fragaria vesca]	/	/	8.54432	8.45121
	RchiOBHm_Chr2g0145271	AIL1	PREDICTED: AP2-like ethylene-responsive transcription factor AIL1 [Fragaria vesca subsp. vesca] [Fragaria vesca]	/	/	1.22239	/
	RchiOBHm_Chr5g0083271	RAP2-11	PREDICTED: ethylene-responsive transcription factor RAP2-11 [Fragaria vesca subsp. vesca] [Fragaria vesca]	/	/	7.54432	/
	RchiOBHm_Chr5g0008971	ERF12	PREDICTED: ethylene-responsive transcription factor 12 [Fragaria vesca subsp. vesca] [Fragaria vesca]	/	/	-5.62591	/
	RchiOBHm_Chr1g0364341	RAP2-7	PREDICTED: ethylene-responsive transcription factor RAP2-7-like isoform X1 [Fragaria vesca subsp. vesca] [Fragaria vesca]	/	/	-3.87248	/
	RchiOBHm_Chr7g0195031	ERF061	PREDICTED: ethylene-responsive transcription factor ERF061 [Prunus mume]	/	/	-2.30606	/
	RchiOBHm_Chr1g0347661	ERF2	PREDICTED: ethylene-responsive transcription factor ERF107-like [Fragaria vesca subsp. vesca] [Fragaria vesca]	/	/	-8.96578	/
	RchiOBHm_Chr2g0105401	ERF4	PREDICTED: ethylene-responsive transcription factor ERF109-like [Fragaria vesca subsp. vesca] [Fragaria vesca]	/	/	-3.99202	/
	RchiOBHm_Chr6g0288251	ERF098	PREDICTED: ethylene-responsive transcription factor ERF098-like [Fragaria vesca subsp. vesca] [Fragaria vesca]	/	/	-4.0906	-3.23078
	RchiOBHm_Chr6g0289271	ERF3	PREDICTED: ethylene-responsive transcription factor 9-like [Fragaria vesca subsp. vesca] [Fragaria vesca]	/	/	-3.8437	/
	RchiOBHm_Chr1g0347631	ERF2	PREDICTED: ethylene-responsive transcription factor 1-like [Fragaria vesca subsp. vesca] [Fragaria vesca]	/	/	-2.30675	/
	RchiOBHm_Chr1g0331141	WRI1	PREDICTED: ethylene-responsive transcription factor WRI1 [Fragaria vesca subsp. vesca] [Fragaria vesca]	/	/	-2.38333	/
	RchiOBHm_Chr3g0468481	AP2	PREDICTED: AP2-like ethylene-responsive transcription factor TOE3 [Fragaria vesca subsp. vesca] [Fragaria vesca]	/	/	/	1.9386
	RchiOBHm_Chr1g0358681	CRF5	PREDICTED: ethylene-responsive transcription factor CRF2 [Fragaria vesca subsp. vesca] [Fragaria vesca]	/	/	/	2.21501
	RchiOBHm_Chr2g0167081	RAP2-11	PREDICTED: ethylene-responsive transcription factor RAP2-2-like [Prunus mume]	/	/	/	1.04692
	RchiOBHm_Chr6g0308371	RAP2-1	PREDICTED: ethylene-responsive transcription factor RAP2-1-like [Fragaria vesca subsp. vesca] [Fragaria vesca]	/	/	/	-1.01125
	RchiOBHm_Chr6g0294441	ERF071	PREDICTED: ethylene-responsive transcription factor ERF071 isoform X1 [Fragaria vesca subsp. vesca] [Fragaria vesca]	/	/	/	-1.2255
jasmonic acid	RchiOBHm_Chr3g0482181	--	hypothetical protein PRUPE_ppb021781mg [Prunus persica]	-4.55002	-2.33275	-4.2426	-2.4604
	RchiOBHm_Chr2g0133001	WRKY40	PREDICTED: probable WRKY transcription factor 40 [Fragaria vesca subsp. vesca] [Fragaria vesca]	-2.41066	/	-2.65705	/
	RchiOBHm_Chr5g0043981	CYP94C1	PREDICTED: cytochrome P450 94C1-like [Fragaria vesca subsp. vesca] [Fragaria vesca]	-2.46079	1.78847	-5.71878	/
	RchiOBHm_Chr5g0072521	CIPK11	PREDICTED: CBL-interacting serine/threonine-protein kinase 11 [Fragaria vesca subsp. vesca] [Fragaria vesca]	-1.28131	/	-1.86095	-1.74264
	RchiOBHm_Chr3g0448661	VDE1	PREDICTED: violaxanthin de-epoxidase, chloroplastic [Fragaria vesca subsp. vesca] [Fragaria vesca]	-1.2167	-1.09076	/	-1.18423
	RchiOBHm_Chr6g0246321	MDHG	PREDICTED: malate dehydrogenase, glyoxysomal isoform X2 [Fragaria vesca subsp. vesca] [Fragaria vesca]	/	-1.2672	-4.06372	/
	RchiOBHm_Chr7g0211621	OPR3	PREDICTED: 12-oxophytodienoate reductase 3-like [Fragaria vesca subsp. vesca] [Fragaria vesca]	/	4.1299	2.89391	/
	RchiOBHm_Chr5g0002961	ATPC	PREDICTED: ATP synthase gamma chain, chloroplastic [Fragaria vesca subsp. vesca] [Fragaria vesca]	/	-1.40274	-4.13799	/
	RchiOBHm_Chr6g0304091	4CLL5	PREDICTED: 4-coumarate--CoA ligase-like 5 [Fragaria vesca subsp. vesca] [Fragaria vesca]	/	1.42664	-2.16158	/
	RchiOBHm_Chr6g0299211	MGD	PREDICTED: monogalactosyldiacylglycerol synthase, chloroplastic [Fragaria vesca subsp. vesca] [Fragaria vesca]	/	/	-1.9242	/
	RchiOBHm_Chr7g0232171	ITPK3	PREDICTED: inositol-tetrakisphosphate 1-kinase 3-like isoform X1 [Fragaria vesca subsp. vesca] [Fragaria vesca]	/	/	-2.28171	/
	RchiOBHm_Chr4g0435441	LTA2	PREDICTED: dihydrolipoyllysine-residue acetyltransferase component 4 of pyruvate dehydrogenase complex, chloroplastic [Fragaria vesca subsp. vesca] [Fragaria vesca]	/	/	-2.14004	/
	RchiOBHm_Chr2g0145961	LOX3.1	PREDICTED: linoleate 13S-lipoxygenase 3-1, chloroplastic-like [Fragaria vesca subsp. vesca] [Fragaria vesca]	-1.62791	1.97753	-2.03725	/
	RchiOBHm_Chr3g0472481	LOX3.1	PREDICTED: linoleate 13S-lipoxygenase 3-1, chloroplastic-like [Prunus mume]	2.79874	5.40467	4.71272	2.80735
	RchiOBHm_Chr6g0285041	LOX2.1	PREDICTED: linoleate 13S-lipoxygenase 2-1, chloroplastic-like [Fragaria vesca subsp. vesca] [Fragaria vesca]	2.935	4.16048	2.48955	2.25596
	RchiOBHm_Chr1g0314111	LOX2.1	PREDICTED: linoleate 13S-lipoxygenase 2-1, chloroplastic-like [Fragaria vesca subsp. vesca] [Fragaria vesca]	/	3.60486	8.31439	/
	RchiOBHm_Chr1g0314131	LOX2.1	PREDICTED: linoleate 13S-lipoxygenase 2-1, chloroplastic-like [Fragaria vesca subsp. vesca] [Fragaria vesca]	/	2.63092	/	3.22674
	RchiOBHm_Chr1g0314151	LOX2.1	PREDICTED: linoleate 13S-lipoxygenase 2-1, chloroplastic-like [Fragaria vesca subsp. vesca] [Fragaria vesca]	/	3.64386	/	/
	RchiOBHm_Chr5g0078091	LOX2.1	PREDICTED: linoleate 13S-lipoxygenase 2-1, chloroplastic-like [Fragaria vesca subsp. vesca] [Fragaria vesca]	/	/	-5.95065	/
	RchiOBHm_Chr4g0430941	LOX6	PREDICTED: lipoxygenase 6, chloroplastic [Fragaria vesca subsp. vesca] [Fragaria vesca]	/	/	-1.87406	/
	RchiOBHm_Chr7g0216951	LOX2.1	PREDICTED: linoleate 13S-lipoxygenase 2-1, chloroplastic-like [Fragaria vesca subsp. vesca] [Fragaria vesca]	/	/	-2.14526	/
	RchiOBHm_Chr5g0078061	LOX2.1	PREDICTED: linoleate 13S-lipoxygenase 2-1, chloroplastic-like [Fragaria vesca subsp. vesca] [Fragaria vesca]	/	/	-2.78563	/
	RchiOBHm_Chr6g0261011	AOS1	PREDICTED: allene oxide synthase-like [Pyrus x bretschneideri]	/	/	12.6853	/
	RchiOBHm_Chr6g0260931	AOS3	PREDICTED: allene oxide synthase-like [Fragaria vesca subsp. vesca] [Fragaria vesca]	/	/	2.78989	/
	RchiOBHm_Chr2g0163151	AOC	PREDICTED: allene oxide cyclase 4, chloroplastic-like [Fragaria vesca subsp. vesca] [Fragaria vesca]	/	2.64595	-2.8167	/
	RchiOBHm_Chr2g0094631	OPR3	PREDICTED: 12-oxophytodienoate reductase 3-like [Fragaria vesca subsp. vesca] [Fragaria vesca]	/	2.21993	/	/
	RchiOBHm_Chr7g0230291	OPR2	PREDICTED: 12-oxophytodienoate reductase 2-like [Prunus mume]	/	3.3638	/	-1.8863
	RchiOBHm_Chr7g0230321	OPR2	PREDICTED: 12-oxophytodienoate reductase 2-like [Prunus mume]	/	2.83133	/	/
	RchiOBHm_Chr6g0260921	AOS3	PREDICTED: allene oxide synthase-like [Fragaria vesca subsp. vesca] [Fragaria vesca]	/	-7.22882	/	-7.22882
	RchiOBHm_Chr7g0226911	AOC4	PREDICTED: allene oxide cyclase 3, chloroplastic-like [Fragaria vesca subsp. vesca] [Fragaria vesca]	1.11996	/	-1.60962	1.01787
	RchiOBHm_Chr4g0435751	AOC	PREDICTED: allene oxide cyclase 3, chloroplastic [Fragaria vesca subsp. vesca] [Fragaria vesca]	1.11637	1.53203	/	1.61375
	RchiOBHm_Chr2g0094611	OPR3	PREDICTED: 12-oxophytodienoate reductase 3-like [Fragaria vesca subsp. vesca] [Fragaria vesca]	-3.27501	/	/	-3.45943
	RchiOBHm_Chr5g0055891	MYC4	PREDICTED: transcription factor MYC2 [Fragaria vesca subsp. vesca] [Fragaria vesca]	/	/	8.78136	/
	RchiOBHm_Chr7g0187141	MYC2	PREDICTED: transcription factor MYC2-like isoform X1 [Prunus mume]	/	1.21611	1.43442	/
	RchiOBHm_Chr7g0209751	MYC2	PREDICTED: transcription factor MYC2-like [Fragaria vesca subsp. vesca] [Fragaria vesca]	-3.04195	/	-3.49329	-1.20235
salicylic acid	RchiOBHm_Chr2g0133001	WRKY40	PREDICTED: probable WRKY transcription factor 40 [Fragaria vesca subsp. vesca] [Fragaria vesca]	-2.41066	/	-2.65705	/
	RchiOBHm_Chr5g0061451	MPK3	PREDICTED: mitogen-activated protein kinase 3 [Fragaria vesca subsp. vesca] [Fragaria vesca]	-2.61554	/	/	/
	RchiOBHm_Chr3g0475651	NHL10	PREDICTED: protein YLS9-like [Fragaria vesca subsp. vesca] [Fragaria vesca]	-4.16927	/	-4.01892	-1.75771
	RchiOBHm_Chr3g0475631	NHL10	PREDICTED: protein YLS9-like [Fragaria vesca subsp. vesca] [Fragaria vesca]	-3.17638	/	-2.00068	-1.86861
	RchiOBHm_Chr3g0475641	NHL10	PREDICTED: protein YLS9-like [Fragaria vesca subsp. vesca] [Fragaria vesca]	-3.80742	/	-2.88212	-1.61178
	RchiOBHm_Chr3g0475661	NHL10	PREDICTED: protein YLS9-like [Fragaria vesca subsp. vesca] [Fragaria vesca]	-3.46053	2.8273	5.27068	-1.98814
	RchiOBHm_Chr5g0034571	TSJT1	PREDICTED: stem-specific protein TSJT1-like [Fragaria vesca subsp. vesca] [Fragaria vesca]	-2.12332	-1.44038	/	/
	RchiOBHm_Chr2g0137121	PDR1	PREDICTED: pleiotropic drug resistance protein 1 [Fragaria vesca subsp. vesca] [Fragaria vesca]	8.1964	/	/	5.82443
	RchiOBHm_Chr6g0280821	PIX13	PREDICTED: probable serine/threonine-protein kinase NAK [Fragaria vesca subsp. vesca] [Fragaria vesca]	-1.31273	1.10918	/	/
	RchiOBHm_Chr3g0462351	AMT2	PREDICTED: ammonium transporter 2 [Fragaria vesca subsp. vesca] [Fragaria vesca]	-1.60411	/	/	/
	RchiOBHm_Chr6g0293831	OsI_27296	PREDICTED: probable E3 ubiquitin-protein ligase BAH1-like 1 [Fragaria vesca subsp. vesca] [Fragaria vesca]	-1.62	/	1.82513	-1.53346
	RchiOBHm_Chr7g0196781	MPK4	PREDICTED: mitogen-activated protein kinase 4-like [Fragaria vesca subsp. vesca] [Fragaria vesca]	/	1.41612	2.08666	/
	RchiOBHm_Chr1g0325221	NQR	PREDICTED: NADPH:quinone oxidoreductase-like [Prunus mume]	/	6.39685	6.97212	/
	RchiOBHm_Chr1g0382951	DMR6	PREDICTED: 1-aminocyclopropane-1-carboxylate oxidase 5 [Fragaria vesca subsp. vesca] [Fragaria vesca]	/	1.58545	1.78279	1.07558
	RchiOBHm_Chr2g0161301	petC	PREDICTED: cytochrome b6-f complex iron-sulfur subunit, chloroplastic [Fragaria vesca subsp. vesca] [Fragaria vesca]	/	-1.29434	-2.17067	/
	RchiOBHm_Chr4g0435431	At4g39670	PREDICTED: ceramide-1-phosphate transfer protein [Fragaria vesca subsp. vesca] [Fragaria vesca]	/	1.38023	4.52194	/
	RchiOBHm_Chr5g0009001	NSL1	PREDICTED: MACPF domain-containing protein NSL1 [Fragaria vesca subsp. vesca] [Fragaria vesca]	/	1.38078	/	/
	RchiOBHm_Chr5g0012351	CAD1	PREDICTED: MACPF domain-containing protein CAD1 [Fragaria vesca subsp. vesca] [Fragaria vesca]	/	1.42399	/	/
	RchiOBHm_Chr5g0025831	At3g55800	PREDICTED: sedoheptulose-1,7-bisphosphatase, chloroplastic-like [Fragaria vesca subsp. vesca] [Fragaria vesca]	/	-2.40885	-6.30223	-1.31685
	RchiOBHm_Chr6g0246321	MDHG	PREDICTED: malate dehydrogenase, glyoxysomal isoform X2 [Fragaria vesca subsp. vesca] [Fragaria vesca]	/	-1.2672	-4.06372	/
	RchiOBHm_Chr6g0297791	ATPG	PREDICTED: ATP synthase subunit b', chloroplastic-like [Pyrus x bretschneideri]	/	-1.34756	-4.42128	/
	RchiOBHm_Chr6g0303791	HMGB9	PREDICTED: high mobility group B protein 9 [Fragaria vesca subsp. vesca] [Fragaria vesca]	/	-1.4423	-4.29334	/
	RchiOBHm_Chr7g0185801	SARD1	PREDICTED: protein SAR DEFICIENT 1 [Malus domestica]	/	2.57855	-4.18536	1.62242
	RchiOBHm_Chr1g0330101	HEMC	PREDICTED: porphobilinogen deaminase, chloroplastic-like [Fragaria vesca subsp. vesca] [Fragaria vesca]	/	-1.2611	/	/
	RchiOBHm_Chr2g0088141	At4g02530	PREDICTED: thylakoid lumenal 16.5 kDa protein, chloroplastic [Fragaria vesca subsp. vesca] [Fragaria vesca]	/	-1.78327	-5.32254	-1.23724
	RchiOBHm_Chr2g0091591	PATROL1	DUF810 domain-containing protein [Cephalotus follicularis]	/	/	1.57027	/
	RchiOBHm_Chr1g0353091	DGD2	PREDICTED: digalactosyldiacylglycerol synthase 2, chloroplastic [Fragaria vesca subsp. vesca] [Fragaria vesca]	/	/	1.47605	/
	RchiOBHm_Chr1g0369301	At3g55800	PREDICTED: sedoheptulose-1,7-bisphosphatase, chloroplastic [Fragaria vesca subsp. vesca] [Fragaria vesca]	/	/	-2.11962	-1.02515
	RchiOBHm_Chr5g0039011	At5g54860	PREDICTED: probable folate-biopterin transporter 4 [Fragaria vesca subsp. vesca] [Fragaria vesca]	/	/	2.85896	/
	RchiOBHm_Chr6g0289611	TSA1	PREDICTED: tryptophan synthase alpha chain [Fragaria vesca subsp. vesca] [Fragaria vesca]	/	/	-2.20302	/
	RchiOBHm_Chr6g0269501	zntB	PREDICTED: zinc transport protein ZntB isoform X1 [Malus domestica]	/	/	-1.71999	/
	RchiOBHm_Chr2g0091501	PATROL1	DUF810 domain-containing protein [Cephalotus follicularis]	/	/	3.152	/
All data are shown log2 Ratio, and positive and negative values of Log2 Ratio are either up- or down-regulated genes in the four pair-comparisons. No significant fold changes are indicated as “/”
